1 E6 proteins from high-risk HPV, low-risk HPV, and animal papillomaviruses activate the  
2 Wnt/ $\beta$ -catenin pathway through E6AP-dependent degradation of NHERF1

3

4 Camille M. Drews<sup>1</sup>, Samuel Case<sup>1</sup>, Scott B. Vande Pol<sup>1\*</sup>

5

6 <sup>1</sup>Department of Pathology, University of Virginia, Charlottesville, VA, USA

7

8 Short title: High and low-risk E6 degrade NHERF1 to activate Wnt signaling

9

10 \* Corresponding author

11 Email: vandepol@virginia.edu (SVP)

12

13

14

15

16

17

18

19

20

21

22

23

## 24 **Abstract**

25 High-risk human papillomavirus (HPV) E6 proteins associate with the cellular  
26 ubiquitin ligase E6-Associated Protein (E6AP), and then recruit both p53 and certain  
27 cellular PDZ proteins for ubiquitination and degradation by the proteasome. Low-risk  
28 HPV E6 proteins also associate with E6AP, yet fail to recruit p53 or PDZ proteins; their  
29 E6AP-dependent targets have so far been uncharacterized. We found a cellular PDZ  
30 protein called Na<sup>+</sup>/H<sup>+</sup> Exchanger Regulatory Factor 1 (NHERF1) is targeted for  
31 degradation by both high and low-risk HPV E6 proteins as well as E6 proteins from  
32 diverse non-primate mammalian species. NHERF1 was degraded by E6 in a manner  
33 dependent upon E6AP ubiquitin ligase activity but independent of PDZ interactions. A  
34 novel structural domain of E6, independent of the p53 recognition domain, was  
35 necessary to associate with and degrade NHERF1, and the NHERF1 EB domain was  
36 required for E6-mediated degradation. Degradation of NHERF1 by E6 activated  
37 canonical Wnt/ $\beta$ -catenin signaling, a key pathway that regulates cell growth and  
38 proliferation. Expression levels of NHERF1 increased with increasing cell confluency.  
39 This is the first study in which a cellular protein has been identified that is targeted for  
40 degradation by both high and low-risk HPV E6 as well as E6 proteins from diverse  
41 animal papillomaviruses. This suggests that NHERF1 plays a role in regulating  
42 squamous epithelial growth and further suggests that the interaction of E6 proteins with  
43 NHERF1 could be a common therapeutic target for multiple papillomavirus types.

44

45

46

## 47 **Author summary**

48 Papillomaviruses cause benign squamous epithelial tumors through the action of virally  
49 encoded oncoproteins termed E6 and E7, which are classified as either high or low-risk  
50 based upon the propensity of the tumor to evolve into cancer. E6 proteins from both  
51 high and low-risk HPVs interact with a cellular ubiquitin ligase called E6AP. High-risk E6  
52 proteins hijack E6AP ubiquitin ligase activity to target p53 for degradation. Degradation  
53 targets of the low-risk E6 proteins in complex with E6AP have not been described.  
54 Here, we describe a protein called NHERF1 that is targeted for degradation by both  
55 high and low-risk E6 proteins, as well as E6 proteins from diverse animal species.  
56 Degradation of NHERF1 resulted in activation of an oncogenic cellular signaling  
57 pathway called Wnt. Identification of NHERF1 as a highly conserved E6 degradation  
58 target could inform therapies directed against both low-risk HPVs and cancer-inducing  
59 high-risk HPVs.

60

61

62

63

64

65

66

67

68

69

## 70 **Introduction**

71 Human papillomaviruses (HPVs) are small DNA tumor viruses that cause  
72 squamous epithelial papillomas in which the virus replicates. The papillomas are initially  
73 benign and the host is usually able to clear the underlying HPV infection over time.  
74 However, a subset of HPV infections may result in lesions that persist and grow to  
75 harmful size or that have a propensity to evolve into carcinomas [1]. The cancer-causing  
76 HPV types are called high-risk and the most commonly occurring high-risk types are  
77 HPV16 and HPV18. Worldwide, high-risk HPVs are responsible for 5% of cancers, with  
78 cervical cancer being the most common [2]. HPV types that are not associated with  
79 malignancies are termed low-risk HPV; although low-risk for malignancies, the size and  
80 location of the benign papillomas can render these lesions medically serious [3].

81 Beyond HPVs, papillomaviruses have been isolated from mammalian species  
82 including rodents, primates, bats, cetaceans, and ungulates [4], and are clustered into  
83 related genera based upon the divergence of the L1 capsid protein nucleotide sequence  
84 (both high and low-risk mucosal HPV types discussed in this study belong to the  
85 primate Alpha genera) [5]. Most non-human papillomaviruses encode E6 proteins that  
86 are similar in predicted fold to high-risk HPV16 E6 [6]. When diverse mammalian  
87 papillomaviruses are clustered based on their E6 sequence similarity, two main groups  
88 of papillomaviruses emerge: those that encode E6 proteins that bind to the Notch co-  
89 activator Mastermind Like 1 (MAML1), and those that bind to a cellular E3 ubiquitin  
90 ligase called E6-Associated Protein (E6AP) [7]. An E6 protein that preferentially binds  
91 MAML1 suppresses MAML1 transcriptional activation, while an E6 protein that  
92 preferentially binds E6AP stimulates E6AP E3 ubiquitin ligase activity to then target

93 additional cellular proteins recruited by E6 to E6AP for ubiquitination and degradation by  
94 the proteasome [7].

95         The difference between the propensity of high and low-risk HPVs to cause  
96 cancer is secondary to differences between their respective E6 and E7 oncoproteins [8].  
97 E6 and E7 from both high and low-risk HPVs bind cellular E3 ubiquitin ligases and  
98 hijack their ubiquitin ligase activity to perturb certain cellular proteins that are recruited  
99 by E6 or E7 [9]. Both high-risk and low-risk E7 proteins interact with ubiquitin ligases of  
100 the cullin and N-end rule families and target the degradation of additional cellular  
101 proteins recruited to E7 such as pocket-family proteins (RB, RBL1, and RBL2) and  
102 PTPN14 [10, 11]. High and low-risk E7 proteins target certain cellular proteins in  
103 common (such as the RBL2 p130 pocket protein) [12]. However only high-risk HPV E7  
104 types interact with and target the degradation of the retinoblastoma (RB) pocket protein  
105 [13, 14], which has implications for the carcinogenic properties of high-risk E7. High and  
106 low-risk Alpha genera HPV E6 proteins interact with the cellular E3 ubiquitin ligase  
107 E6AP [15-17], but only cellular proteins targeted for degradation by the high-risk E6  
108 protein (such as p53) are well established [18, 19].

109         Another striking difference between high and low-risk E6 is the presence of a  
110 PDZ binding motif (PBM) at the extreme carboxy terminus of high-risk E6 proteins [20-  
111 22]]. The high-risk PBM enables E6 to interact with a group of cellular proteins termed  
112 PDZ proteins, all of which contain PDZ (PSD-90/Dlg1/ZO-1) homology domains [23].  
113 The targeted degradation of cellular proteins that are recruited through interaction with  
114 the high-risk E6 PBM has been controversial, but the E6 PBM functionally promotes  
115 retention of the viral DNA plasmid within infected cells [24]; the E6 PBM function can be

116 rescued by disruption of p53 function [25]. Although low-risk E6 proteins bind E6AP,  
117 they do not have a PBM at the carboxy-terminus [20], do not interact with p53 [17], and  
118 no cellular targets of the low-risk E6+E6AP complex have been described. Such cellular  
119 targets would be presumed to be of exceptional interest since they would be common to  
120 both high and low-risk E6 proteins, just as RBL2 is a common target of the high and  
121 low-risk HPV E7 protein.

122 In this study, we identify the PDZ-adaptor protein NHERF1 as degraded by both  
123 high and low-risk E6 proteins, in a manner dependent upon the ubiquitin ligase activity  
124 of E6AP and the proteasome. Other E6 proteins from diverse species where E6 could  
125 bind E6AP were also able to initiate NHERF1 degradation, indicating the conservation  
126 of this function. Interaction of NHERF1 with E6 required prior association of E6 with  
127 E6AP, and we identified a novel interaction domain within 16E6 that is required. Finally,  
128 the targeted degradation of NHERF1 by both low and high-risk E6 proteins resulted in  
129 the activation of canonical Wnt signaling, connecting the degradation of NHERF1 by E6  
130 to the activation of an oncogenic signaling pathway.

131

## 132 **Results**

### 133 **NHERF1 protein levels are reduced by high and low-risk E6 proteins in the** 134 **presence of E6AP\_WT.**

135 NHERF1 was previously shown to be degraded by HPV16 E6 (16E6) (but not by  
136 HPV18 E6 (18E6) or HPV11 E6 (11E6)) through an interaction requiring the PBM of  
137 16E6 [26]. In our proteomic studies of cellular proteins that associate with the 16E6 and  
138 18E6 PBMs [27], we did not identify NHERF1, but in other experiments observed a

139 reduction of NHERF1 protein levels by 16E6, 18E6, and 11E6. In order to characterize  
140 the reduction of NHERF1 by these E6 proteins, we performed transient transfections  
141 into E6AP-null 8B9 cells reconstituted with either WT E6AP (E6AP\_WT) or a mutant  
142 E6AP defective in ubiquitin ligase activity (E6AP\_Ub<sup>-</sup>). E6APs were co-transfected with  
143 plasmids encoding p53, NHERF1, and 16E6, 16E6 deleted of the PBM (16E6 $\Delta$ PBM),  
144 11E6, or 18E6. Consistent with published literature, p53 was degraded by high-risk E6  
145 proteins (16E6 and 18E6) independently of a PBM [25] and dependent upon E6AP  
146 ubiquitin ligase activity [28] (Fig 1). Expression of 11E6 together with E6AP\_WT  
147 resulted in a lack of p53 degradation by low-risk E6 (11E6), corroborating published  
148 findings [17, 29]. However, NHERF1 protein levels were reduced by each observed E6  
149 protein (Fig 1A), in contrast to what has been previously published [26].

150 To ensure the reduction of NHERF1 by either high or low-risk E6 proteins was  
151 not due to an overexpression artifact, we performed an E6 titration experiment (Fig 1B).  
152 Representative western blots from which the quantification in Fig 1B was derived are  
153 shown in S1 Fig. Three different E6 proteins were used: 16E6\_WT, 16E6 $\Delta$ PBM, and  
154 11E6\_WT. We used p53 as a control for 16E6-mediated degradation, as multiple  
155 studies have shown low-risk E6 proteins (11E6) do not degrade p53 [17, 29] while high-  
156 risk 16E6 is able to degrade p53 independent of the presence of a PBM [25]. Observing  
157 the degradation of p53 in cells expressing variable amounts of E6 provided a guide for  
158 physiologically relevant E6 expression levels. NHERF1 and p53 protein levels were  
159 similarly reduced by both 16E6\_WT and 16E6 $\Delta$ PBM at the various E6 titrations (Fig  
160 1B). 11E6\_WT was unable to initiate the degradation of p53 but targeted NHERF1 at

161 levels similar to those required by 16E6. Deletion of the 16E6 PBM did not impact the  
162 degradation of p53 or reduction of NHERF1 protein levels by 16E6.

163 **NHERF1 protein levels are sensitive to cell confluency.**

164 We established that NHERF1 protein levels are reduced by E6 in a transient  
165 transfection system. To determine whether low levels of stable 16E6-expression could  
166 initiate the reduction of NHERF1 protein levels, we retrovirally transduced normal  
167 immortalized keratinocytes with either empty vector or 16E6\_WT and observed  
168 NHERF1 protein levels. Initially, our results were variable. We hypothesized that  
169 keratinocyte confluency may affect NHERF1 protein levels. To test this possibility, we  
170 seeded vector-transduced and 16E6\_WT-transduced keratinocytes at three different  
171 cell densities:  $5 \times 10^3$  cells/cm<sup>2</sup> (very sub-confluent),  $1.3 \times 10^4$  cells/cm<sup>2</sup> (sub-confluent),  
172 and  $2.6 \times 10^4$  cells/cm<sup>2</sup> (mid-confluent). NHERF1 protein levels increased with an  
173 increase in cell density and 16E6\_WT consistently reduced NHERF1 (Fig 2A). In order  
174 to determine if changes in NHERF1 levels with confluency were secondary to changes  
175 in NHERF1 RNA levels, we performed qPCR on RNA extracted from keratinocytes  
176 retrovirally transduced with vector or 16E6\_WT and plated as in Fig 2A. Interestingly,  
177 NHERF1 RNA levels did not differ between keratinocytes seeded at different densities  
178 expressing either empty vector or 16E6\_WT (Fig 2B).

179 **E6-mediated degradation of NHERF1 occurs via the proteasome.**

180 Because the ability of each E6 protein to reduce NHERF1 protein levels was also  
181 dependent upon the ubiquitin ligase activity of E6AP (Fig 1A), we hypothesized that E6  
182 reduction of NHERF1 levels would be secondary to proteasome activity. We seeded  
183 retrovirally transduced keratinocytes expressing either empty vector or 16E6\_WT at



184 similar confluency and treated with either DMSO, mitomycin C (MMC) to induce p53  
185 [30], or the proteasome inhibitor MG132 at differing concentrations for 8 hours. As  
186 expected, p53 levels increased in vector keratinocytes treated with MMC compared to  
187 untreated cells as well as in 16E6\_WT cells exposed to increasing concentrations of  
188 MG132 [28] (Fig 3). NHERF1 protein levels increased significantly in a dose dependent  
189 manner upon treatment with MG132 in parallel to that seen with p53. (Fig 3, lanes 3-8).  
190 This indicated that NHERF1 is degraded through the proteasome by E6 in a manner  
191 dependent upon WT E6AP.

192 **E6-mediated degradation of NHERF1 is conserved across papillomaviruses from**  
193 **diverse hosts.**

194 The observation that NHERF1 was targeted by both high and low-risk HPV E6  
195 proteins suggested that NHERF1 may also be a target of diverse non-primate E6  
196 proteins. We examined the ability of E6 proteins from multiple different genera and  
197 different mammalian species to target NHERF1 for degradation (Fig 4). E6 proteins that  
198 preferentially bind MAML1 were unable to degrade NHERF1 (Fig 4A and 4B). All of the  
199 tested Alpha (primate), Dyodelta (boar), and Dyopi (porpoise) genera E6 proteins that  
200 bind E6AP targeted NHERF1. While E6AP-binding was necessary it was not sufficient,  
201 as E6 proteins from Omega (polar bear, UmPV1) and Omikron (cetaceans, PphPV1  
202 and TtPV5) did not degrade NHERF1 (Fig 4A). Interestingly, E6 proteins that bind E6AP  
203 but did not target NHERF1 degradation sequence-clustered separately from E6 proteins  
204 that did target NHERF1 degradation, suggesting evolutionary divergence of this function  
205 (Fig 4B).

206 **A novel 16E6 substrate interaction domain is required for 16E6 degradation of**  
207 **NHERF1.**

208 Because the ability of E6 to degrade NHERF1 was not dependent upon the  
209 presence of a PBM (Figs 1 and 4), we attempted to identify which residue(s) of 16E6  
210 were required to mediate degradation of NHERF1. The crystal structure of 16E6  
211 complexed with the E6-binding peptide from E6AP [31] (Fig 6A) was examined to  
212 identify amino acids that were at least 20% exposed, resulting in over eighty candidate  
213 residues (S2 Fig). Candidate residues were individually mutated in the context of the  
214 16E6 gene and the resulting point mutants were screened for their ability to degrade  
215 NHERF1 in the presence of E6AP\_WT in transiently transfected C33 cells. To ensure  
216 our point mutants were not functionally defective (i.e. could not fold properly or could not  
217 interact with E6AP), we also screened the mutants for ability to degrade p53. A  
218 selection of mutants and the results of the screen are shown in Fig 5. Four mutants  
219 stood out as selectively defective in their ability to degrade NHERF1 (Fig 5B) while still  
220 being able to degrade p53 (Fig 5C): F69A, K72A, F69R and a double mutant:  
221 F69A/K72A. As evidenced in the crystal structure of 16E6, the side chains of F69 and  
222 K72 (Fig 6B) are located along the connecting alpha-helix that links the amino-terminal  
223 and carboxy-terminal zinc-structured domains of 16E6. The F69 and K72 side chains  
224 are aligned and adjacent on the connecting helix, which is on the opposite side of 16E6  
225 from the p53 interaction surface [32] (Fig 6C).

226 We had identified the 16E6\_F69A/K72A mutant in a transient transfection  
227 screen. To ensure the identified 16E6\_F69A/K72A double mutant was selectively  
228 defective for degrading NHERF1 in the context of a stable cell line, keratinocytes

229 retrovirally transduced with empty vector, 16E6\_WT, 16E6 $\Delta$ PBM, 16E6\_F69A/K72A, or  
230 11E6\_WT were seeded at equal confluency and lysates prepared. Keratinocytes  
231 expressing 16E6\_WT, 16E6 $\Delta$ PBM, and 11E6\_WT degraded NHERF1 (Fig 7, lanes 2, 3,  
232 5). However, keratinocytes expressing 16E6\_F69A/K72A were unable to stimulate the  
233 degradation of NHERF1 (Fig 7, lane 4), indicating a novel substrate interaction domain  
234 important for 16E6-mediated degradation of NHERF1.

### 235 **Degradation of NHERF1 by 16E6 requires the NHERF1 EB domain.**

236 Because the PBM of E6 proteins is not required to initiate the degradation of  
237 NHERF1 (Figs 1, 4, and 7), we hypothesized that neither of the PDZ domains of  
238 NHERF1 would be required for 16E6 to initiate NHERF1 degradation. We truncated  
239 NHERF1 and deleted several characterized domains within the protein [33, 34] (Fig 8A).  
240 E6AP-null 8B9 cells were co-transfected with 16E6\_WT, NHERF1 truncations,  
241 HA\_GFP, and either E6AP\_Ub<sup>-</sup> or E6AP\_WT. NHERF1 protein levels were quantified,  
242 and then normalized to the internal transfection control (HA\_GFP). The various  
243 NHERF1 truncations displayed different expression levels. To account for these  
244 variations, levels of NHERF1 truncations in the presence of E6AP\_Ub<sup>-</sup> were set to  
245 100% and the expression level of the corresponding NHERF1 truncation in the  
246 presence of E6AP\_WT was normalized accordingly (Fig 8B and 8C, bar graphs). All  
247 NHERF1 truncations containing the EB domain were targeted for degradation by 16E6  
248 in the presence of E6AP\_WT (highlighted in green in Fig 8A). Truncations of NHERF1  
249 that lacked the EB domain were not targeted for degradation by 16E6 (highlighted in red  
250 in Fig 8A). In addition, the NHERF1 PBM was not required for 16E6 mediated  
251 degradation (Fig 8C, lanes 5 vs. 6 and 9 vs. 10).

252 We identified the NHERF1 EB domain as a requirement for 16E6 mediated  
253 degradation and the importance of 16E6 residues F69 and K72. In order to examine the  
254 interactions between the 16E6+E6AP+NHERF1 complex, all three proteins were  
255 expressed in a yeast three-hybrid system so as to detect the heterotrimeric complex.  
256 We fused 16E6\_WT and ubiquitin ligase dead E6AP (E6AP\_Ub<sup>-</sup>) to the LexA DNA  
257 binding domain and co-expressed this fusion with either vector, 16E6\_WT, or  
258 16E6\_F69A/K72A in yeast containing a LexA responsive LacZ reporter. These yeast  
259 were then mated to yeast expressing native p53 or Gal4 (G4) transactivator fusions to  
260 NHERF1 121-358 (containing the EB domain), NHERF1 121-297 (deleted of the EB  
261 domain), 16E6\_WT, or the tyrosine phosphatase PTPN3 (a PDZ protein) (Fig 9). The  
262 LexA\_16E6 fusion co-expressed with p53 (in the absence of E6AP) resulted in very  
263 weak activation of the LacZ reporter (spot 4B) while co-expression with G4\_PTPN3  
264 resulted in strong transactivation (spot 6B), but no interaction with NHERF1 (spots 2B  
265 and 3B). We then co-expressed 16E6 and E6AP by using a LexA\_E6AP\_Ub<sup>-</sup> fusion  
266 together with native 16E6. When LexA\_E6AP\_Ub<sup>-</sup>, untagged 16E6\_WT, and p53 were  
267 co-expressed, a strong activation of the LacZ reporter was observed (Fig 9, spot 4D),  
268 illustrating that while p53 has a weak direct interaction with 16E6, it interacts strongly  
269 with 16E6 bound to E6AP. This activation was also seen with 16E6\_F69A/K72A in the  
270 presence of LexA\_E6AP\_Ub<sup>-</sup> and p53 (Fig 9, spot 4E), indicating the preserved ability  
271 of the 16E6\_F69A/K72A double mutant to bind E6AP and recruit p53. When  
272 LexA\_E6AP\_Ub<sup>-</sup>, 16E6\_WT, and G4\_NHERF1 121-358 (contains the EB domain) were  
273 co-expressed, we observed activation of the LacZ reporter, indicating the recruitment of  
274 NHERF1 to E6AP by 16E6\_WT (Fig 9, spot 2D). Truncating the EB domain from the

275 G4\_NHERF1 (G4\_NHERF1 121-297, spot 3D) or the use of the 16E6\_F69A/K72A  
276 double mutant (spot 2E) ablated the reporter transactivation, indicating the requirement  
277 of the EB domain and the importance of 16E6 residues F69 and K72 in the interaction  
278 of the 16E6+E6AP+NHERF1 complex.

279 **E6AP-dependent NHERF1 degradation by E6 activates the canonical Wnt/ $\beta$ -**  
280 **catenin pathway.**

281 It has been shown that high-risk HPV E6 proteins augment the canonical Wnt/ $\beta$ -  
282 catenin signaling pathway [35-39]. Additionally, it has been shown that NHERF1 inhibits  
283 the canonical Wnt/ $\beta$ -catenin signaling pathway through multiple mechanisms. NHERF1  
284 forms a complex with  $\beta$ -catenin [40] and can also bind to the intracellular PBM of certain  
285 isoforms of Frizzled [41], a G-protein coupled receptor important in the activation of the  
286 canonical Wnt signaling pathway. Therefore, we hypothesized E6 degradation of  
287 NHERF1 would activate the Wnt/ $\beta$ -catenin signaling pathway in cells expressing E6. To  
288 test this possibility, we utilized the TOP/FOP luciferase reporter assay. 16E6,  
289 16E6 $\Delta$ PBM, 11E6, and 18E6 all stimulated the activity of the Wnt/ $\beta$ -catenin pathway  
290 over vector-transfected cells (Fig 10). However, cells transfected with 16E6\_F69A/K72A  
291 were unable to augment the canonical Wnt pathway over vector levels, indicating that  
292 the ability of E6 to degrade NHERF1 is required for E6 activation of the canonical  
293 Wnt/ $\beta$ -catenin signaling pathway.

294 The earlier Accardi et al. study proposed that expression of 16E7 sensitized  
295 NHERF1 for degradation by the induction of NHERF1 phosphorylation [26]. Our  
296 experiments did not show either E7 induction of slow-migrating NHERF1

297 phosphorylated isoforms or an enhancement of E6-NHERF1 degradation upon co-  
298 expression of E7 (S3 and S4 Figs).

299

## 300 **Discussion**

301 E6 proteins from papillomaviruses can be separated into distinct groups: those  
302 that bind MAML1 and repress Notch signaling, and those that bind E6AP and hijack its  
303 ubiquitin ligase activity [7, 42-44]. E6 proteins from papillomaviruses in the Alpha,  
304 DyoDelta, Dyopi, Omega, and Omikron genera all behave similarly in that they bind  
305 E6AP and activate its ubiquitin ligase activity [7]. Here, we describe the degradation of  
306 NHERF1 by E6 proteins from both high and low-risk HPVs, as well as from  
307 papillomaviruses from multiple divergent mammalian species. The ability of these E6s  
308 to degrade NHERF1 is dependent upon E6AP (Fig 1) and the proteasome (Fig 3). In  
309 addition, we identify two amino acids in 16E6 (F69 and K72) that are necessary for E6-  
310 mediated degradation of NHERF1. These two residues are aligned, and adjacent in the  
311 outwardly oriented face of the E6 connecting alpha helix, suggesting a novel interaction  
312 domain (Fig 6B and 6C). NHERF1 degradation by E6 requires the NHERF1 EB domain,  
313 but does not require the PBM at the extreme carboxy terminus of NHERF1 (Fig 8B and  
314 8C). The ability of E6 proteins to degrade NHERF1 augments the canonical Wnt/ $\beta$ -  
315 catenin signaling (Fig 10), an oncogenic pathway frequently active in cancer.

316 NHERF1 is the product of the SLC9A3R1 gene. SLC9A3R1 mRNA is broadly  
317 expressed in epithelia, with the highest mRNA expression in kidney, gut, and  
318 esophagus. NHERF1 is not developmentally essential, although mice have considerably  
319 reduced lifespans [45]. NHERF1-null mice are prone to phosphate wasting, brittle bone

320 structure, and hydrocephaly [45] due to the mislocalization of proteins with which  
321 NHERF1 normally associates [45-47]. NHERF1 contains two PDZ domains and an EB  
322 domain at the carboxy terminus through which it interacts with ezrin, radixin, and  
323 moesin to link itself, and proteins to which it is bound, to the actin cytoskeleton network  
324 [48]. While the functions of NHERF1 are varied due to its role as a scaffold, multiple  
325 studies indicate it regulates cell growth and differentiation, two key cellular functions that  
326 papillomaviruses disrupt in the process of viral infection.

327         Whether NHERF1 is a tumor suppressor or an oncogene has been debated in  
328 the literature. There are numerous papers regarding NHERF1 human cancer  
329 phenotypes, but they are collectively inconsistent [49, 50]. NHERF1-null mice do not  
330 have a direct cancer phenotype, but have lengthened intestines [51], indicating a growth  
331 regulatory function of NHERF1. The diminished life span of NHERF1 null mice could  
332 limit observation of cancer traits. However, a recent in vivo study provided strong  
333 genetic support for NHERF1 as a tumor suppressor. APC<sup>Min/+</sup> mice bred as either  
334 heterozygote or knockout for NHERF1 experience considerably shorter survival than  
335 their NHERF1-expressing counterparts due to increased tumor burden, demonstrating a  
336 tumor suppressor phenotype for NHERF1 [51]. Additionally, these APC<sup>Min/+</sup> mice lacking  
337 NHERF1 have greater activation of Wnt/ $\beta$ -catenin signaling, suggesting NHERF1 acts  
338 as a negative regulator of this oncogenic pathway. NHERF1-associated proteins that  
339 plausibly could regulate cell proliferation are numerous and include  $\beta$ -catenin [40],  
340 Frizzled [41], G-protein coupled receptors ( $\beta$ -adrenergic type 2, [52]), receptor tyrosine  
341 kinases (PDGFR, [53]), phosphatases (PTEN, [54]), transcriptional coactivators (YAP1,

342 [55]), ion channels (Kir1.1 and CFTR, [56]), phospholipase-C [57], and actin anchoring  
343 proteins (ezrin, radixin, and moesin, [48]).

344 Several studies have indicated that HPV E6 proteins can activate canonical  
345 Wnt/ $\beta$ -catenin signaling [35-39]. Our work expands and builds upon the scope of  
346 these studies. The ability of E6 to degrade NHERF1 and activate Wnt signaling may  
347 aid in propagation of papillomaviruses by enhancing the stimulation of cellular  
348 proliferation and promoting cell survival. There are numerous cell growth regulatory  
349 avenues that E6 could manipulate by degrading NHERF1 and within this study we  
350 have explored one possibility: the canonical Wnt/ $\beta$ -catenin signaling pathway (Fig  
351 10); other possibilities will be the subject of future studies.

352 The EB domain of NHERF1 is required for E6-mediated degradation in the  
353 presence of E6AP (Fig 8B and 8C). This domain is responsible for linking NHERF1 to  
354 the actin cytoskeleton network via interaction with ERM proteins [48]. NHERF1 has a  
355 PBM at its extreme carboxy terminus and when the EB domain is not bound to ERM  
356 proteins, the NHERF1 PBM can self-associate with the NHERF1 PDZ2 domain,  
357 resulting in a closed NHERF1 conformation [33]. The head-to-tail closed NHERF1  
358 confirmation is not required for E6-mediated degradation, as an NHERF1 $\Delta$ PBM mutant  
359 was still targeted for degradation by E6 in the presence of E6AP\_WT (Fig 8C). Nor was  
360 the 16E6 PBM required for degradation of NHERF1 (Figs 1, 4, and 7), contrary to a  
361 prior report [26].

362 In addition to the requirement of the NHERF1 EB domain, two E6 residues, F69  
363 and K72, are necessary for E6-mediated NHERF1 degradation (Figs 5 and 7). Crucially,  
364 the 16E6\_F69A/K72A double mutant can still initiate the degradation of p53, indicating it



365 is still able to bind E6AP, recruit p53 to the complex, and trigger ubiquitination. The F69  
366 and K72 residues are also required to form a tri-molecular complex between E6AP, E6,  
367 and NHERF1 in yeast (Fig 9, spot 2E vs. 2D). Like the association of E6 with p53,  
368 NHERF1 does not interact directly with E6, but requires prior association of E6 with  
369 E6AP, indicating that NHERF1 requires an altered conformation of E6 that is secondary  
370 to E6 binding to E6AP [58].

371 As we were testing the ability of E6 proteins to degrade NHERF1 in stable  
372 keratinocyte cell lines, we discovered that NHERF1 protein levels are sensitive to cell  
373 confluency (Fig 2A). The relationship between NHERF1 and cell confluency may  
374 contribute to the lack of identification of NHERF1 as a degradation target of low-risk E6  
375 proteins in the past, as well as differences between our studies and a prior publication  
376 [26]. It is likely that this observation underlies disparate findings between different  
377 laboratories regarding NHERF1 cancer associated traits [49, 50]. Future studies of  
378 NHERF1 must take into account and carefully control cell densities when performing  
379 experiments.

380 Binding to E6AP is necessary for E6-induced degradation of NHERF1, but it is  
381 not sufficient, as three tested E6 proteins that bind E6AP do not target NHERF1 for  
382 degradation: UmPV1 E6 (polar bear), PphPV1 E6 (porpoise), and TtPV5 E6 (bottlenose  
383 dolphin) (Fig 4A). Interestingly, the three E6 proteins that do not degrade NHERF1  
384 cluster together in phylogenetic relatedness (Fig 4B). We utilized transfected human  
385 NHERF1 throughout our study, so it is possible that the inability of these three E6  
386 proteins to target NHERF1 for degradation may be due to evolutionary divergence in the  
387 NHERF1 homologs. Future studies will explore if the lack of degradation of human

388 NHERF1 by UmPV1, PphPV1, and TtPV5 is due to evolutionary divergence of the  
389 respective NHERF1 proteins compared to human NHERF1. It would be of interest to  
390 determine if NHERF1 is a “universal” target of E6 proteins that act through association  
391 with E6AP.

392 Discovery of NHERF1 as a novel target for not only high and low-risk mucosal  
393 and cutaneous HPV E6 as well as a wide range of E6 proteins across divergent host  
394 species indicates a significant and previously undescribed role for NHERF1 in  
395 papillomavirus biology. That NHERF1 is a conserved target of papillomavirus E6  
396 proteins further elevates the importance of NHERF1 as a cell growth regulator. Finally,  
397 the identification of this highly conserved E6 degradation target may represent a novel  
398 avenue for therapeutic intervention against both low and high-risk HPV.

399

## 400 **Materials and methods**

### 401 **Cells and cell culture**

402 E6AP-null 8B9 cells (a gift of Dr. Lawrence banks, ICGEB, Italy) [59] and HPV-negative  
403 C33A cervical cancer cells (ATCC) were maintained and transfected using  
404 polyethylenimine (PEI) as previously described [58]. Normal immortalized keratinocytes  
405 (NIKS, obtained from ATCC) are spontaneously immortalized foreskin keratinocytes [60]  
406 that were cocultured with mitomycin C-treated 3T3 feeder cells in F medium as  
407 described previously [61]. NIKS were retrovirally transduced with replication-defective  
408 murine retroviruses based on pLXSN [62] as previously described [25]. Retrovirally  
409 transduced NIKS cells were counted and seeded at equal confluency in each  
410 experiment.

411 **Plasmids**

412 Epitope tagged E6AP, GFP, E6, and NHERF1 were all transiently expressed from the  
413 pcDNA3 plasmid. HA-tagged NHERF1 originated from Vijaya Ramesh's laboratory  
414 (from Addgene, plasmid 11635). 16E6 point mutants were created using QuikChange  
415 primer design (Agilent Technologies). NHERF1 truncations were PCR generated and  
416 sequenced.

417 **Antibodies and Western blots**

418 12 well plates of transfected mammalian cells were lysed in 0.5X IPEGAL as described  
419 previously [7]. Transduced NIKS were lysed in 1% SDS, 5mM EDTA, and 1 mM sodium  
420 vanadate and equilibrated for protein content (Biorad assay kit). All lysates were  
421 resolved by SDS-PAGE electrophoresis and transferred to PVDF membranes.

422 Antibodies: anti-HA (Bethyl Laboratories, Inc.), anti-FLAG M2 (Sigma), anti-p53 Ab-8  
423 (ThermoFisher Scientific), anti-16E6 6G6 (a generous gift from Arbor Vita Corporation),  
424 anti-SLC9A3R1 (Sigma), anti-GAPDH (Cell Signaling Technology), and anti-MYC 9B11  
425 (Cell Signaling Technology).

426 **RT-PCR**

427 Retrovirally transduced NIKS were plated at different cell densities and harvested  
428 following a TRizol RNA harvest protocol (Invitrogen). cDNA was generated using  
429 random hexamers. Quantitative real-time PCR was performed on the cDNA using iQ™  
430 SYBR® Green Supermix (BioRad #1708880). The primers targeted the SLC9A3R1  
431 gene (BioRad Assay ID: qHsaCEP0050521) and the GAPDH gene (BioRad Assay ID:  
432 qHsaCEP0041396). Relative values were analyzed using the  $\Delta\Delta C_T$  method (where  $C_T$   
433 is the threshold cycle) and GAPDH as a control.

#### 434 **Wnt/ $\beta$ -catenin luciferase reporter assay**

435 C33A cells plated at 70% confluency were transiently transfected with DNA of the  
436 TOPFLASH or control FOPFLASH (containing mutated TCF/ $\beta$ -catenin binding sites; 1  
437 ug) plasmid, Renilla luciferase (0.005 ug) plasmid (used to evaluate transfection  
438 efficiency), FLAG\_E6AP\_WT (0.35 ug) plasmid, and the indicated E6 plasmids (0.3 ug).  
439 18 hrs post-transfection, media was removed and Wnt3A conditioned media was added  
440 for 8.5 hours to stimulate the Wnt pathway. Luciferase levels were measured using the  
441 Dual-Luciferase® Reporter Assay System (Promega) and a Cytation1 Plate Reader  
442 (software version 3.04.17). FOPFLASH luciferase readings were low, and were  
443 subtracted from the paired TOPFLASH readouts. 10% fetal bovine serum Wnt3A  
444 conditioned media was generated using L Wnt-3A murine fibroblasts (ATCC, CRL-  
445 2647) as previously described [63].

#### 446 **Phylogenetic analysis**

447 Multiple protein sequence files were downloaded from the Papillomavirus Episteme [64]  
448 and aligned using the EMBL-EBI MUSCLE (Multiple Sequence Comparison by Log-  
449 Expectation) program [65]. The phylogenetic tree was generated as a neighbour-joining  
450 tree without distance corrections within the MUSCLE program [65].

#### 451 **Yeast expression**

452 Modified LexA-based yeast three-hybrid assays were performed as previously  
453 described [58].

454

#### 455 **Acknowledgements**

456 We thank Nicole Brimer for assistance with technical challenges that were encountered  
457 throughout this study and Kelly Drews for extensive discussions and for critical reading  
458 of the manuscript.

459

## 460 **References**

- 461 1. zur Hausen H. Papillomaviruses in the causation of human cancers - a brief  
462 historical account. *Virology*. 2009;384(2):260-5.
- 463 2. de Martel C, Plummer M, Vignat J, Franceschi S. Worldwide burden of cancer  
464 attributable to HPV by site, country and HPV type. *Int J Cancer*. 2017;141(4):664.
- 465 3. Egawa N, Doorbar J. The low-risk papillomaviruses. *Virus Res*. 2017;231:119-27.
- 466 4. Rector A, Van Ranst M. Animal papillomaviruses. *J Virol*. 2013;445(1):213--23.
- 467 5. de Villiers EM, Fauquet C, Broker TR, Bernard HU, zur Hausen H. Classification  
468 of papillomaviruses. *Virology*. 2004;324(1):17-27.
- 469 6. Vande Pol SB. Papillomavirus E6 Oncoproteins Take Common Structural  
470 Approaches to Solve Different Biological Problems. *PLoS Pathog*.  
471 2015;11(10):e1005138.
- 472 7. Brimer N, Drews CM, Vande Pol SB. Association of papillomavirus E6 proteins  
473 with either MAML1 or E6AP clusters E6 proteins by structure, function, and  
474 evolutionary relatedness. *PLoS Pathog*. 2017;13(12):e1006781.
- 475 8. Klingelhutz AJ, Roman A. Cellular transformation by human papillomaviruses:  
476 lessons learned by comparing high- and low-risk viruses. *Virology*.  
477 2012;424(2):77-98.

- 478 9. Davey NE, Trave G, Gibson TJ. How viruses hijack cell regulation. Trends  
479 Biochem Sci. 2011;36(3):159-69.
- 480 10. Roman A, Munger K. The papillomavirus E7 proteins. Virology. 2013;445(1-  
481 2):138-68.
- 482 11. White EA, Münger K, Howley PM. High-Risk Human Papillomavirus E7 Proteins  
483 Target PTPN14 for Degradation. MBio. 2016;7(5):01530--16.
- 484 12. Zhang B, Chen W, Roman A. The E7 proteins of low- and high-risk human  
485 papillomaviruses share the ability to target the pRB family member p130 for  
486 degradation. Proc Natl Acad Sci U S A. 2006;103(2):437.
- 487 13. Münger K, Werness BA, Dyson N, Phelps WC, Harlow E, Howley PM. Complex  
488 formation of human papillomavirus E7 proteins with the retinoblastoma tumor  
489 suppressor gene product. EMBO J. 1989;8(13):4099--105.
- 490 14. Boyer SN, Wazer DE, Band V. E7 Protein of Human Papilloma Virus-16 Induces  
491 Degradation of Retinoblastoma Protein through the Ubiquitin-Proteasome  
492 Pathway. Cancer Res. 1996;56(20):4620--4.
- 493 15. Huibregtse JM, Scheffner M, Howley PM. A cellular protein mediates association  
494 of p53 with the E6 oncoprotein of human papillomavirus types 16 or 18. EMBO J.  
495 1991;10(13):4129-35.
- 496 16. Huibregtse JM, Scheffner M, Howley PM. Cloning and expression of the cDNA  
497 for E6-AP, a protein that mediates the interaction of the human papillomavirus E6  
498 oncoprotein with p53. Mol Cell Biol. 1993;13(2):775-84.
- 499 17. Brimer N, Lyons C, Vande Pol SB. Association of E6AP (UBE3A) with human  
500 papillomavirus type 11 E6 protein. Virology. 2007;358(2):303-10.

- 501 18. Cooper B, Schneider S, Bohl J, Jiang Y, Beaudet A, Vande Pol S. Requirement  
502 of E6AP and the features of human papillomavirus E6 necessary to support  
503 degradation of p53. *Virology*. 2003;306(1):87-99.
- 504 19. Vande Pol SB, Klingelutz AJ. Papillomavirus E6 oncoproteins. *Virology*.  
505 2013;445(1-2):115-37.
- 506 20. Lee SS, Weiss RS, Javier RT. Binding of human virus oncoproteins to  
507 hDlg/SAP97, a mammalian homolog of the *Drosophila* discs large tumor  
508 suppressor protein. *Proc Natl Acad Sci U S A*. 1997;94(13):6670.
- 509 21. Songyang Z, Fanning AS, Fu C, Xu J, Marfatia SM, Chishti AH, et al. Recognition  
510 of Unique Carboxyl-Terminal Motifs by Distinct PDZ Domains. *Science*.  
511 1997;275(5296):73--7.
- 512 22. Kiyono T, Hiraiwa A, Fujita M, Hayashi Y, Akiyama T, Ishibashi M. Binding of  
513 high-risk human papillomavirus E6 oncoproteins to the human homologue of the  
514 *Drosophila* discs large tumor suppressor protein. *Proc Natl Acad Sci U S A*.  
515 1997;94(21):11612--6.
- 516 23. Ganti K, Broniarczyk J, Manoubi W, Massimi P, Mittal S, Pim D, et al. The  
517 Human Papillomavirus E6 PDZ Binding Motif: From Life Cycle to Malignancy.  
518 *Viruses*. 2015;7(7):3530.
- 519 24. Lee C, Laimins LA. Role of the PDZ domain-binding motif of the oncoprotein E6  
520 in the pathogenesis of human papillomavirus type 31. *J Virol*.  
521 2004;78(22):12366--77.

- 522 25. Brimer N, Vande Pol SB. Papillomavirus E6 PDZ interactions can be replaced by  
523 repression of p53 to promote episomal human papillomavirus genome  
524 maintenance. *J Virol.* 2014;88(5):3027-30.
- 525 26. Accardi R, Rubino R, Scalise M, Gheit T, Shahzad N, Thomas M, et al. E6 and  
526 E7 from human papillomavirus type 16 cooperate to target the PDZ protein Na/H  
527 exchange regulatory factor 1. *J Virol.* 2011;85(16):8208-16.
- 528 27. Webb Strickland S, Brimer N, Lyons C, Vande Pol SB. Human Papillomavirus E6  
529 interaction with cellular PDZ domain proteins modulates YAP nuclear  
530 localization. *Virology.* 2018;516:127-38.
- 531 28. Scheffner M, Huibregtse JM, Vierstra RD, Howley PM. The HPV-16 E6 and E6-  
532 AP complex functions as a ubiquitin-protein ligase in the ubiquitination of p53.  
533 *Cell.* 1993;75(3):495-505.
- 534 29. Scheffner M, Werness BA, Huibregtse JM, Levine AJ, Howley PM. The E6  
535 oncoprotein encoded by human papillomavirus types 16 and 18 promotes the  
536 degradation of p53. *Cell.* 1990;63(6):1129-36.
- 537 30. Abbas T, Olivier M, Lopez J, Houser S, Xiao G, Kumar GS, et al. Differential  
538 Activation of p53 by the Various Adducts of Mitomycin C. *J Biol Chem.*  
539 2002;277(43):40513--9.
- 540 31. Zanier K, Charbonnier S, Sidi AO, McEwen AG, Ferrario MG, Poussin-  
541 Courmontagne P, et al. Structural basis for hijacking of cellular LxxLL motifs by  
542 papillomavirus E6 oncoproteins. *Science.* 2013;339(6120):694-8.



- 543 32. Martinez-Zapien D, Ruiz FX, Poirson J, Mitschler A, Ramirez J, Forster A, et al.  
544 Structure of the E6/E6AP/p53 complex required for HPV-mediated degradation of  
545 p53. *Nature*. 2016;529(7587):541-5.
- 546 33. Morales FC, Takahashi Y, Momin S, Adams H, Chen X, Georgescu MM.  
547 NHERF1/EBP50 head-to-tail intramolecular interaction masks association with  
548 PDZ domain ligands. *Mol Cell Biol*. 2007;27(7):2527-37.
- 549 34. Bhattacharya S, Dai Z, Li J, Baxter S, Callaway DJE, Cowburn D, et al. A  
550 Conformational Switch in the Scaffolding Protein NHERF1 Controls Autoinhibition  
551 and Complex Formation. *J Biol Chem*. 2010;285(13):9981--94.
- 552 35. Bello JO, Nieva LO, Paredes AC, Gonzalez AM, Zavaleta LR, Lizano M.  
553 Regulation of the Wnt/beta-Catenin Signaling Pathway by Human Papillomavirus  
554 E6 and E7 Oncoproteins. *Viruses*. 2015;7(8):4734-55.
- 555 36. Bonilla-Delgado J, Bulut G, Liu X, Cortes-Malagon EM, Schlegel R, Flores-  
556 Maldonado C, et al. The E6 oncoprotein from HPV16 enhances the canonical  
557 Wnt/beta-catenin pathway in skin epidermis in vivo. *Mol Cancer Res*.  
558 2012;10(2):250-8.
- 559 37. Lichtig H, Gilboa DA, Jackman A, Gonen P, Levav-Cohen Y, Haupt Y, et al.  
560 HPV16 E6 augments Wnt signaling in an E6AP-dependent manner. *Virology*.  
561 2010;396(1):47-58.
- 562 38. Sominsky S, Kuslansky Y, Shapiro B, Jackman A, Haupt Y, Rosin-Arbesfeld R,  
563 et al. HPV16 E6 and E6AP differentially cooperate to stimulate or augment Wnt  
564 signaling. *Virology*. 2014;468-470:510-23.

- 565 39. Sominsky S, Shterzer N, Jackman A, Shapiro B, Yaniv A, Sherman L. E6  
566 proteins of alpha and beta cutaneous HPV types differ in their ability to potentiate  
567 Wnt signaling. *Virology*. 2017;509:11-22.
- 568 40. Kreimann EL, Morales FC, de Orbeta-Cruz J, Takahashi Y, Adams H, Liu TJ, et  
569 al. Cortical stabilization of beta-catenin contributes to NHERF1/EBP50 tumor  
570 suppressor function. *Oncogene*. 2007;26(36):5290-9.
- 571 41. Wheeler DS, Barrick SR, Grubisha MJ, Brufsky AM, Friedman PA, Romero G.  
572 Direct interaction between NHERF1 and Frizzled regulates beta-catenin  
573 signaling. *Oncogene*. 2011;30(1):32-42.
- 574 42. Brimer N, Lyons C, Wallberg AE, Vande Pol SB. Cutaneous papillomavirus E6  
575 oncoproteins associate with MAML1 to repress transactivation and NOTCH  
576 signaling. *Oncogene*. 2012;31(43):4639-46.
- 577 43. Meyers JM, Spangle JM, Munger K. The HPV8 E6 protein interferes with NOTCH  
578 activation during keratinocyte differentiation. *J Virol*. 2013.
- 579 44. Tan MJ, White EA, Sowa ME, Harper JW, Aster JC, Howley PM. Cutaneous  
580 beta-human papillomavirus E6 proteins bind Mastermind-like coactivators and  
581 repress Notch signaling. *Proc Natl Acad Sci U S A*. 2012;109(23):E1473-80.
- 582 45. Shenolikar S, Voltz JW, Minkoff CM, Wade JB, Weinman EJ. Targeted disruption  
583 of the mouse NHERF-1 gene promotes internalization of proximal tubule sodium-  
584 phosphate cotransporter type IIa and renal phosphate wasting. *Proc Natl Acad  
585 Sci U S A*. 2002;99(17):11470-5.
- 586 46. Cunningham R, Brazie M, Kanumuru S, E X, Biswas R, Wang F, et al. Sodium-  
587 hydrogen exchanger regulatory factor-1 interacts with mouse urate transporter 1

- 588 to regulate renal proximal tubule uric acid transport. *J Am Soc Nephrol.*  
589 2007;18(5):1419--25.
- 590 47. Weinman EJ, Wang Y, Wang F, Greer C, Steplock D, Shenolikar S. A C-terminal  
591 PDZ motif in NHE3 binds NHERF-1 and enhances cAMP inhibition of sodium-  
592 hydrogen exchange. *Biochemistry.* 2003;42(43):12662--8.
- 593 48. Reczek D, Berryman M, Bretscher A. Identification of EBP50: A PDZ-containing  
594 phosphoprotein that associates with members of the ezrin-radixin-moesin family.  
595 *J Cell Biol.* 1997;139(1):169-79.
- 596 49. Centonze M, Saponaro C, Mangia A. NHERF1 Between Promises and Hopes:  
597 Overview on Cancer and Prospective Openings. *Transl Oncol.* 2018;11(2):374-  
598 90.
- 599 50. Vaquero J, Nguyen Ho-Boulidoires TH, Claperon A, Fouassier L. Role of the  
600 PDZ-scaffold protein NHERF1/EBP50 in cancer biology: from signaling  
601 regulation to clinical relevance. *Oncogene.* 2017;36(22):3067-79.
- 602 51. Georgescu MM, Gagea M, Cote G. NHERF1/EBP50 Suppresses Wnt-beta-  
603 Catenin Pathway-Driven Intestinal Neoplasia. *Neoplasia.* 2016;18(8):512-23.
- 604 52. Hall RA, Premont RT, Chow CW, Blitzer JT, Pitcher JA, Claing A, et al. The  
605 beta2-adrenergic receptor interacts with the Na<sup>+</sup>/H<sup>+</sup>-exchanger regulatory factor  
606 to control Na<sup>+</sup>/H<sup>+</sup> exchange. *Nature.* 1998;392(6676):626-30.
- 607 53. Maudsley S, Zamah AM, Rahman N, Blitzer JT, Luttrell LM, Lefkowitz RJ, et al.  
608 Platelet-derived growth factor receptor association with Na<sup>(+)</sup>/H<sup>(+)</sup> exchanger  
609 regulatory factor potentiates receptor activity. *Mol Cell Biol.* 2000;20(22):8352-63.

- 610 54. Takahashi Y, Morales FC, Kreimann EL, Georgescu MM. PTEN tumor  
611 suppressor associates with NHERF proteins to attenuate PDGF receptor  
612 signaling. *EMBO J.* 2006;25(4):910-20.
- 613 55. Mohler PJ, Kreda SM, Boucher RC, Sudol M, Stutts MJ, Milgram SL. Yes-  
614 associated protein 65 localizes p62(c-Yes) to the apical compartment of airway  
615 epithelia by association with EBP50. *J Cell Biol.* 1999;147(4):879-90.
- 616 56. Yoo D, Flagg TP, Olsen O, Raghuram V, Foskett JK, Welling PA. Assembly and  
617 trafficking of a multiprotein ROMK (Kir 1.1) channel complex by PDZ interactions.  
618 *J Biol Chem.* 2004;279(8):6863-73.
- 619 57. Tang Y, Tang J, Chen Z, Trost C, Flockerzi V, Li M, et al. Association of  
620 mammalian trp4 and phospholipase C isozymes with a PDZ domain-containing  
621 protein, NHERF. *J Biol Chem.* 2000;275(48):37559-64.
- 622 58. Ansari T, Brimer N, Vande Pol SB. Peptide interactions stabilize and restructure  
623 human papillomavirus type 16 E6 to interact with p53. *J Virol.*  
624 2012;86(20):11386-91.
- 625 59. Massimi P, Shai A, Lambert P, Banks L. HPV E6 degradation of p53 and PDZ  
626 containing substrates in an E6AP null background. *Oncogene.*  
627 2008;27(12):1800-4.
- 628 60. Allen-Hoffmann BL, Schlosser SJ, Ivarie CA, Sattler CA, Meisner LF, O'Connor  
629 SL. Normal growth and differentiation in a spontaneously immortalized near-  
630 diploid human keratinocyte cell line, NIKS. *J Invest Dermatol.* 2000;114(3):444-  
631 55.

- 632 61. Lambert PF, Ozbun MA, Collins A, Holmgren S, Lee D, Nakahara T. Using an  
633 immortalized cell line to study the HPV life cycle in organotypic "raft" cultures.  
634 *Methods Mol Med.* 2005;119:141-55.
- 635 62. Miller AD, Rosman GJ. Improved retroviral vectors for gene transfer and  
636 expression. *Biotechniques.* 1989;7(9):980-2, 4-6, 9-90.
- 637 63. Wickramasinghe SN. Culture of animal cells. A manual of basic technique. 3rd  
638 ed. New York: R. Ian Freshney, Wiley-Liss, Inc.; 1996. 75-6 p.
- 639 64. Van Doorslaer K, Li Z, Xirasagar S, Maes P, Kaminsky D, Liou D, et al. The  
640 Papillomavirus Episteme: a major update to the papillomavirus sequence  
641 database. *Nucleic Acids Res.* 2017;45(D1):499--506.
- 642 65. Edgar RC. MUSCLE: multiple sequence alignment with high accuracy and high  
643 throughput. *Nucleic Acids Res.* 2004;32(5):1792--7.

644

## 645 **Figure legends**

### 646 **Fig 1. NHERF1 protein levels are reduced by both high and low-risk E6 proteins.**

647 (A) NHERF1 protein levels are reduced in an E6 and E6AP dependent manner.

648 Plasmids encoding the indicated FLAG\_E6AP (1 ug), HA\_NHERF1 (0.5 ug), human

649 p53 (0.5 ug), HA\_GFP (0.08 ug), and the listed E6 proteins (1 ug) were transiently

650 transfected into E6AP-null 8B9 cells and HA-NHERF1 expression was analyzed by

651 western blot. Reduction of NHERF1 protein levels by high or low-risk E6 requires ligase

652 active E6AP (E6AP\_WT) but does not require the E6 PDZ binding motif (PBM).

653 FLAG\_18E6\* is a truncated splice isoform of 18E6. E6AP\_Ub<sup>-</sup> denotes an E6AP

654 mutant defective for ubiquitin ligase activity. Quantitation is the result of three

655 independent experiments (N=3) where NHERF1 levels are normalized to co-transfected  
656 HA\_GFP. Shown is a single representative blot. Vertical black line in blots represents  
657 removal of an irrelevant sample. The means of triplicate independent experiments  $\pm$   
658 standard error are shown. N=3. \* $<0.05$ , \*\* $<0.01$  by Student's t-test. (B) Reduction of  
659 NHERF1 protein is not an overexpression artifact. Titrations of the indicated E6 proteins  
660 were co-transfected with FLAG\_E6AP\_WT (1 ug), HA\_GFP (0.02 ug), and either  
661 HA\_NHERF1 (0.5 ug) or p53 (0.5 ug) in murine 8B9 cells. With increased E6  
662 expression, NHERF1 decreased for each E6 protein parallel with p53. As expected, p53  
663 degradation was observed for the high-risk 16E6 proteins (both WT and  $\Delta$ PBM) but not  
664 by low-risk 11E6 protein despite reduction of NHERF1 protein levels by 11E6. The  
665 means of triplicate independent experiments  $\pm$  standard error are shown.

666

667 **Fig 2. NHERF1 protein levels increase with increased cell density.** (A) Protein  
668 levels of endogenous NHERF1 increase with cell confluency. Keratinocytes retrovirally  
669 transduced with either vector or 16E6\_WT were counted and plated at the indicated cell  
670 densities. As confluency increased, NHERF1 protein levels also increased, though still  
671 reduced in the presence of 16E6\_WT. The means of triplicate independent experiments  
672  $\pm$  standard error are shown. (B) NHERF1 RNA levels are not changed by cell  
673 confluency or by the presence of 16E6\_WT. Total RNA was extracted from  
674 keratinocytes retrovirally transduced with either vector or 16E6\_WT and plated at the  
675 indicated cell densities. cDNA was reverse transcribed and NHERF1 RNA levels  
676 determined by qPCR. The means of triplicate independent experiments  $\pm$  standard error  
677 are shown.

678

679 **Fig 3. Degradation of NHERF1 by 16E6 requires proteasome function.**

680 Keratinocytes retrovirally transduced with either vector or 16E6\_WT were seeded at  
681 equal confluency. Cells were treated with DMSO, mitomycin C (MMC), or the  
682 proteasome inhibitor MG132 at varying concentrations for 8 hours as indicated. MG132  
683 significantly rescued NHERF1 protein levels in a dose dependent manner. MMC  
684 treatment was used to induce p53 levels, which were observed as a positive control.  
685 Quantification was normalized to vector-transduced cells treated with DMSO. The  
686 means of triplicate independent experiments  $\pm$  standard error are shown. N=3, \* $<0.05$ ,  
687 \*\* $<0.01$ , \*\*\* $<0.001$ , n.s. = no significance by Student's t-test for samples compared to  
688 untreated 16E6 keratinocytes (lane 3).

689

690 **Fig 4. E6 proteins from evolutionarily diverse species target NHERF1. (A) E6**

691 proteins from divergent animal species degrade NHERF1 via E6AP. HA\_NHERF1 (0.4  
692 ug), HA\_GFP (0.1 ug), FLAG\_E6AP\_WT (0.35 ug), and the indicated FLAG\_E6 (0.3 ug)  
693 plasmids were co-transfected into C33 cells. E6 proteins are classified based on their  
694 known preference for binding E6AP or MAML as indicated. NHERF1 was degraded by  
695 E6 proteins isolated from numerous different mammalian species. Many, but not all, of  
696 the E6 proteins that bind E6AP targeted NHERF1 for degradation, while E6 proteins  
697 that bind MAML1 did not. HA\_NHERF1 protein levels in the presence of the indicated  
698 E6 proteins were normalized to co-transfected HA\_GFP as an internal transfection  
699 control. A single representative blot and the means of five independent experiments  $\pm$   
700 standard error are shown. N=5, \*\* $<0.01$ , \*\*\* $<0.001$  by Student's t-test. (B) E6 proteins

701 that degrade NHERF1 cluster phylogenetically. The E6 proteins from the listed  
702 papillomaviruses were subjected to a multiple sequence alignment and then clustered  
703 phylogenetically using the program MUSCLE [65]. For E6 physical association, blue  
704 denotes MAML1 and light purple denotes E6AP. The preferential association of three  
705 E6 proteins is unknown. Ability to degrade NHERF1 is denoted in green and lack of  
706 ability to degrade NHERF1 is indicated by red. Interestingly, E6 proteins that can bind  
707 E6AP but not degrade NHERF1 cluster differently from other E6 proteins that cannot  
708 degrade NHERF1. The genera of each papillomavirus is listed. Western blot indicating  
709 NHERF1 expression in the presence of HPV1 E6, HPV8 E6, and SfPV1 E6 is shown in  
710 S3 Fig. H = *Homo sapiens* (human), Mm = *Macaca mulata* (rhesus monkey), Ss = *Sus*  
711 *scrofa* (wild boar), Pph = *Phocoena phocoena* (harbor porpoise), Um = *Ursus maritimus*  
712 (polar bear), Tt = *Tursiops truncatus* (bottlenose dolphin), Oc = *Oryctolagus cuniculus*  
713 (rabbit), Mc = *Mastomys coucha* (mouse), Ma = *Mesocricetus auratus* (golden hamster),  
714 Sf = *Sylvilagus floridanus* (Cottontail rabbit; CRPV1). Caption credit: Brimer N, Drews  
715 CM, Vande Pol SB. Association of papillomavirus E6 proteins with either MAML1 or  
716 E6AP clusters E6 proteins by structure, function, and evolutionary relatedness. PLoS  
717 Pathog. 2017;13(12):e1006781.

718

719 **Fig 5. 16E6 mutagenesis screen identified mutants selectively defective in their**  
720 **ability to degrade NHERF1. (A)** Amino acids F69 and K72 are important for  
721 degradation of NHERF1 by 16E6. Plasmids encoding untagged 16E6\_WT or 16E6  
722 mutants (0.3 ug) were co-transfected with FLAG\_E6AP (0.35 ug), HA\_NHERF1 (0.4  
723 ug), MYC\_p53 (0.25 ug), and HA\_GFP (0.08 ug) into C33 cells and HA\_NHERF1 levels



724 determined by western blot. Multiple 16E6 proteins were identified that were unable to  
725 degrade NHERF1 but were still capable of degrading p53. **(B)** HA\_NHERF1 and **(C)**  
726 p53 protein levels were quantified and normalized to co-transfected HA\_GFP as an  
727 internal transfection control.

728

729 **Fig 6. Amino acid side chains F69 and K72 define a novel substrate interaction**  
730 **domain on 16E6.** **(A)** HPV16 E6 structure (PDB file 4GIZ) showing the amino-terminal  
731 zinc-structured domain in green, connecting alpha helix in yellow, and the carboxy-  
732 terminal zinc-structured domain in blue. The E6 protein is complexed with the LXXLL  
733 peptide of E6AP (pictured in light pink). **(B)** The E6 protein depicted in A is rotated 45°  
734 clockwise (C.W.) and the F69 and K72 residues and their side chains are highlighted in  
735 red. **(C)** A similar view as part B is shown complexed with the core p53 DNA binding  
736 domain (grey). The E6 interaction face with p53 is opposite the F69 and K72 residues.  
737

738 **Fig 7. NHERF1 degradation by E6 proteins from both high and low-risk**  
739 **papillomaviruses in stable keratinocytes.** Keratinocytes retrovirally transduced with  
740 the indicated E6 proteins were seeded at equal confluency and endogenous NHERF1  
741 protein levels were normalized to GAPDH. 16E6\_WT, 16E6 deleted of its PBM ( $\Delta$ PBM),  
742 and 11E6\_WT all degraded NHERF1. The 16E6\_F69A/K72A double mutant did not  
743 target NHERF1 for degradation. The means of triplicate independent experiments  $\pm$   
744 standard error and one representative blot are shown. N=3, \*<0.05, \*\*<0.01, n.s. = no  
745 significance by Student's t-test.

746

747 **Fig 8. NHERF1 truncations identify the EB domain as necessary for NHERF1**  
748 **degradation by 16E6. (A)** Schematic of NHERF1 truncations. NHERF1 proteins that  
749 were successfully degraded by 16E6\_WT are depicted in green while truncations that  
750 were not degraded are depicted in red. **(B and C)** NHERF1 truncations containing the  
751 EB domain were degraded, while those lacking the EB domain were not. The listed  
752 HA\_NHERF1 truncations (shown in A in the order loaded in B and C, 0.8 ug), untagged  
753 16E6\_WT (1 ug), FLAG\_GFP (0.08 ug), and either FLAG\_E6AP\_WT (1.2 ug) or  
754 FLAG\_E6AP\_Ub<sup>-</sup> (1.2 ug, defective for ubiquitin ligase activity) were co-transfected in  
755 E6AP-null 8B9 cells. HA\_NHERF1 levels were quantified and normalized to FLAG\_GFP  
756 as an internal transfection control. The bar graph below the blot represents  
757 quantification of each listed HA\_NHERF1 truncation. In panel C, the WT NHERF1 in  
758 lanes 2-4 contains an amino terminal 1X HA tag while the WT NHERF1 in lanes 17 and  
759 18 contains an amino terminal 2X HA tag. All of the NHERF1 truncations contain amino  
760 terminal 2X HA tags. Levels of HA\_NHERF1 truncations in the presence of  
761 FLAG\_E6AP\_WT were normalized to their corresponding expression in the presence of  
762 FLAG\_E6AP\_Ub<sup>-</sup> to account for the differing expression levels. UT = untransfected.  
763

764 **Fig 9. The E6-E6AP-NHERF1 complex can be modeled in yeast.** Yeast three-hybrid  
765 plasmids expressing the LexA DNA binding domain fused to either 16E6\_WT or  
766 E6AP\_Ub<sup>-</sup> were co-expressed in yeast (bait) together with either vector, 16E6\_WT, or  
767 16E6\_F69A/K72A as indicated. The bait yeast were mated to prey yeast expressing  
768 Gal4 activation domain (G4), or G4 fused to 16E6\_WT, PTPN3, truncations of NHERF1,  
769 or native p53 and diploids selected. Positive controls for 16E6 expression included the

770 established interaction of the 16E6 PBM with the PDZ domain of tyrosine phosphatase  
771 PTPN3 and 16E6-E6AP complex interaction with p53. 16E6\_WT recruited NHERF1,  
772 p53, and PTPN3 to LexA\_E6AP\_Ub<sup>-</sup>. The recruitment of NHERF1 to LexA\_E6AP\_Ub<sup>-</sup>  
773 by 16E6 was specifically lost upon mutation of residues F69 and K72, however, p53 and  
774 PTPN3 recruitment were maintained. 16E6\_WT recruitment of NHERF1 was not seen  
775 with an NHERF1 truncation lacking the EB domain (G4\_NHERF1 121-297). Caption  
776 credit: Ansari T, Brimer N, Vande Pol SB. Peptide interactions stabilize and restructure  
777 human papillomavirus type 16 E6 to interact with p53. J Virol. 2012;86(20):11386-91.  
778

779 **Fig 10. Activation of the canonical Wnt/ $\beta$ -catenin pathway is augmented by E6**  
780 **proteins that can degrade NHERF1.** The listed E6 proteins were co-expressed with  
781 FLAG\_E6AP\_WT, the TOPFLASH or FOPFLASH luciferase reporter, and a renilla  
782 luciferase internal transfection control plasmid in C33A cells. Transfected cells were  
783 treated with Wnt3A conditioned media for 8.5 hours, lysed in 1X passive lysis buffer  
784 (Promega), and measured for luciferase and renilla luminescence. Fold activation was  
785 determined by normalizing the TOPFLASH luminescence by the FOPFLASH  
786 luminescence. Each E6 protein that could degrade NHERF1 (16E6\_WT, 16E6\_ $\Delta$ PBM,  
787 11E6\_WT, and 18E6\_WT) augmented the canonical Wnt pathway. 16E6\_F69A/K72A,  
788 which cannot degrade NHERF1, failed to increase Wnt pathway activation over vector  
789 levels. Statistical significance was determined from three independent experiments by  
790 Student's t-test (\*\*<math>0.001</math>, n.s. = no significance).

791

792

## 793 **Supporting information legends**

### 794 **S1 Fig. Reduction of NHERF1 protein levels is not an overexpression artifact.**

795 Titrations of the indicated three different E6 proteins (16E6\_WT, 16E6\_ΔPBM, and  
796 11E6\_WT) were co-transfected with FLAG\_E6AP\_WT (1 ug), HA\_GFP (0.02 ug), and  
797 either HA\_NHERF1 (0.5 ug) or p53 (0.5 ug) in E6AP-null 8B9 cells. A representative  
798 blot of the triplicate experiments for each E6 protein is shown. Increased E6 expression  
799 for 16E6\_WT, 16E6ΔPBM, and 11E6\_WT resulted in decreased NHERF1 protein  
800 levels. Both 16E6\_WT and 16E6ΔPBM degrade p53 with increasing E6 expression.  
801 Overexpression of 11E6\_WT (>0.1 ug E6) resulted in degradation of co-expressed  
802 E6AP\_WT.

803

### 804 **S2 Fig. 16E6 point mutants screened to determine amino acid(s) necessary for** 805 **NHERF1 degradation.** The 16E6 crystal structure (PDB file 4GIZ) was examined for

806 residues that were at least 20% exposed as determined by the Swiss PDB Viewer.  
807 Point mutants of these identified amino acids were then screened to identify which  
808 residue(s) resulted in an E6 protein that was selectively defective for degrading  
809 NHERF1 but retained degradation of p53. Residues of interest are indicated in red.

810

### 811 **S3 Fig. The E7 papillomavirus protein does not induce phospho-specific isoforms**

812 **of NHERF1.** Keratinocytes retrovirally transduced with vector or the indicated E7 and/or  
813 E6 proteins were seeded at equal confluency. Levels of endogenous NHERF1 were  
814 determined by western blot. Levels of phosphorylated NHERF1 (pNHERF1) were  
815 unchanged in keratinocytes expressing empty vector compared to the various E7

816 proteins. Keratinocytes expressing the E6 protein from high-risk (HPV16) and low-risk  
817 (HPV11) degraded NHERF1. H = *Homo sapiens* (human), Sf = *Sylvilagus floridanus*  
818 (Cottontail rabbit; CRPV1). Caption credit: Accardi R, Rubino R, Scalise M, Gheit T,  
819 Shahzad N, Thomas M, et al. E6 and E7 from human papillomavirus type 16 cooperate  
820 to target the PDZ protein Na/H exchange regulatory factor 1. J Virol. 2011;85(16):8208-  
821 16.

822

823 **S4 Fig. The presence of the E7 oncoprotein does not enhance NHERF1**

824 **degradation by E6 proteins.** C33A cells were co-transfected with the following  
825 plasmids: HA\_NHERF1 (0.4 ug), FLAG\_E6AP\_WT (0.35 ug), HA\_GFP (0.08 ug), the  
826 indicated E6 protein (0.3 ug), and the indicated E7 protein (0.3 ug). HA\_NHERF1 levels  
827 were determined by western blot. FLAG\_18E6\* is a truncated splice isoform of 18E6.  
828 Quantitation is derived from three experimental replicates. A representative blot and  
829 means of triplicate independent experiments  $\pm$  standard error are shown. N=3. \*\*<0.01,  
830 \*\*\*<0.001, \*\*\*\*0.0001, n.s. = no significance by Student's t-test.

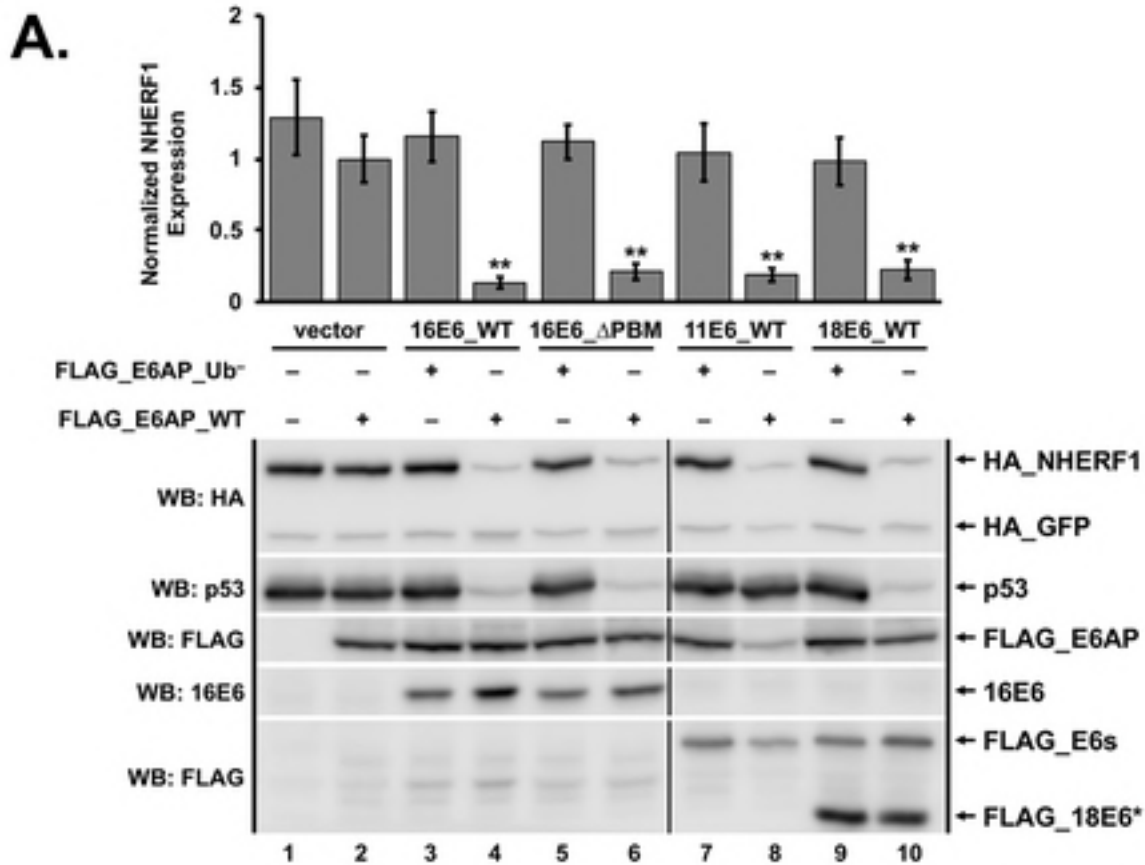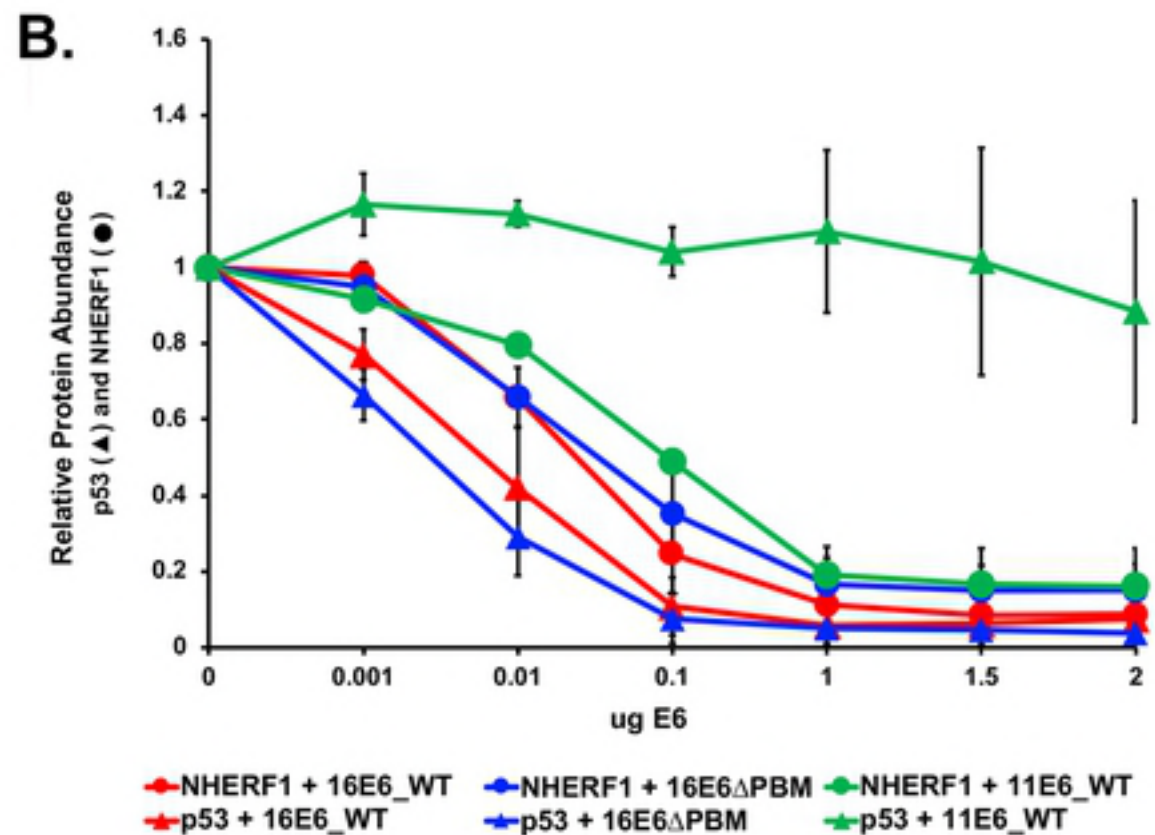

Fig1

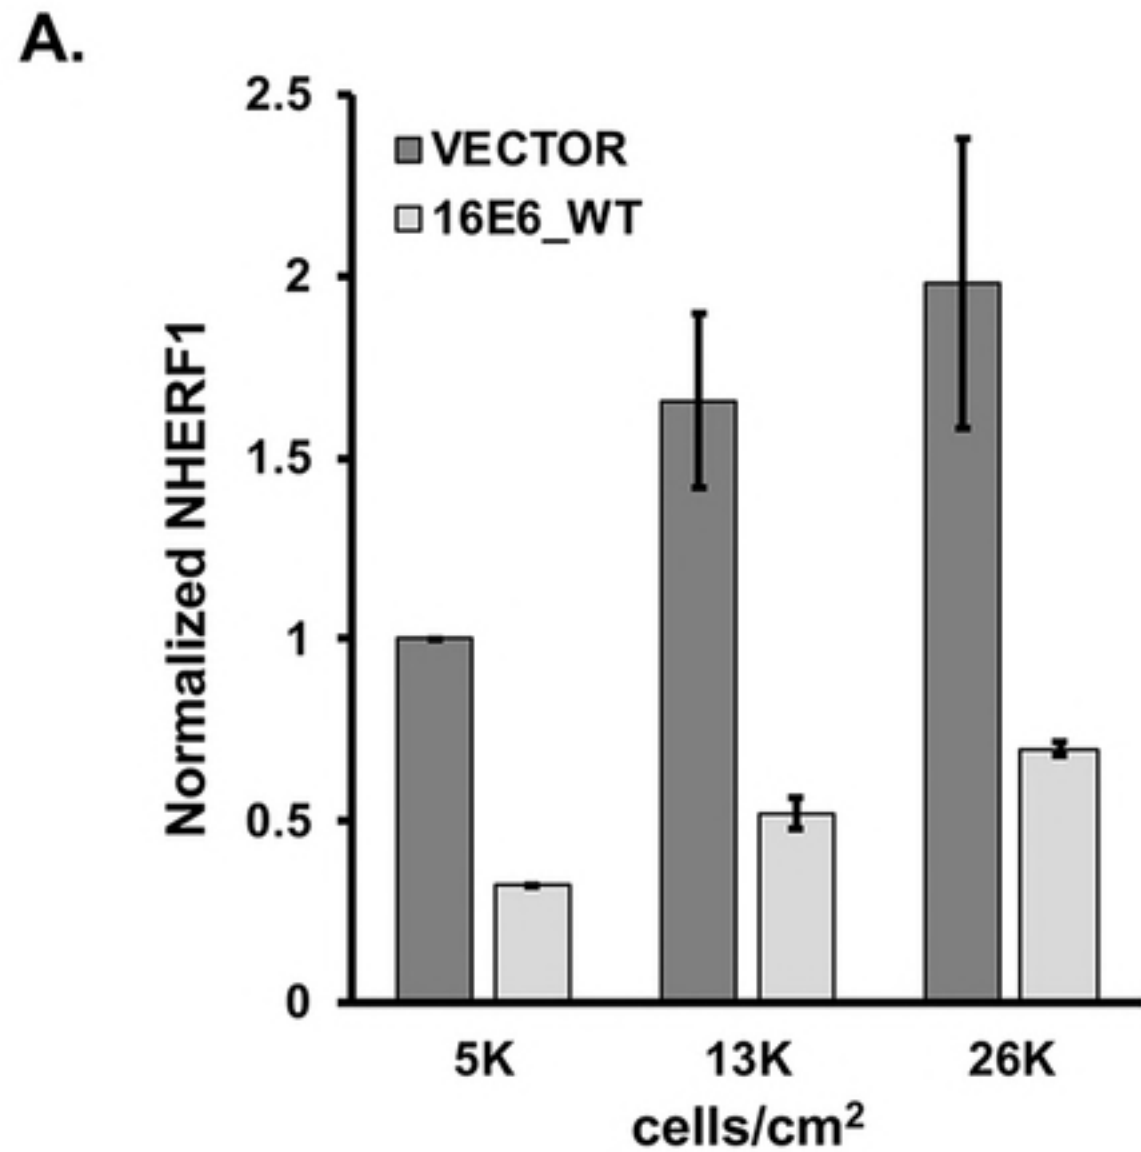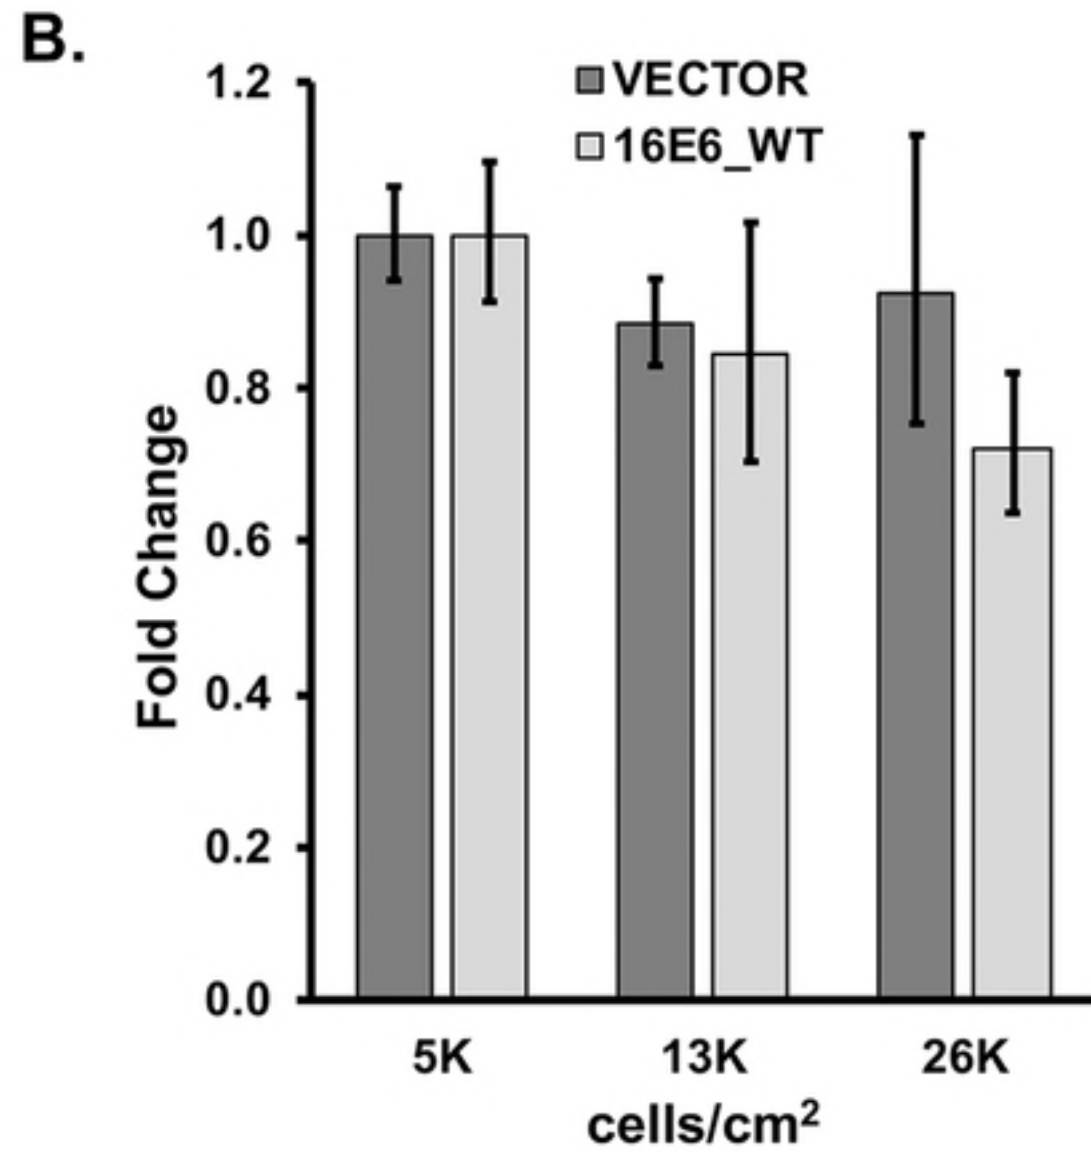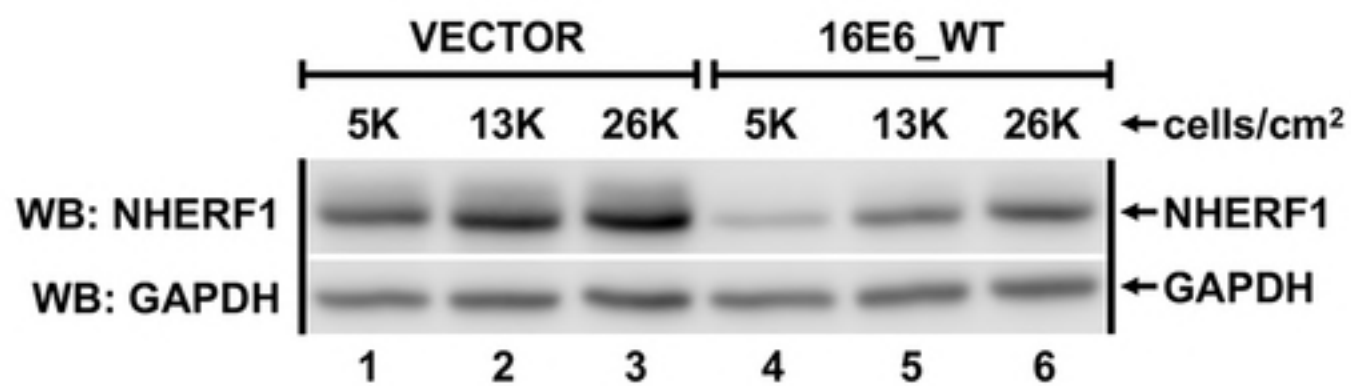

Fig2

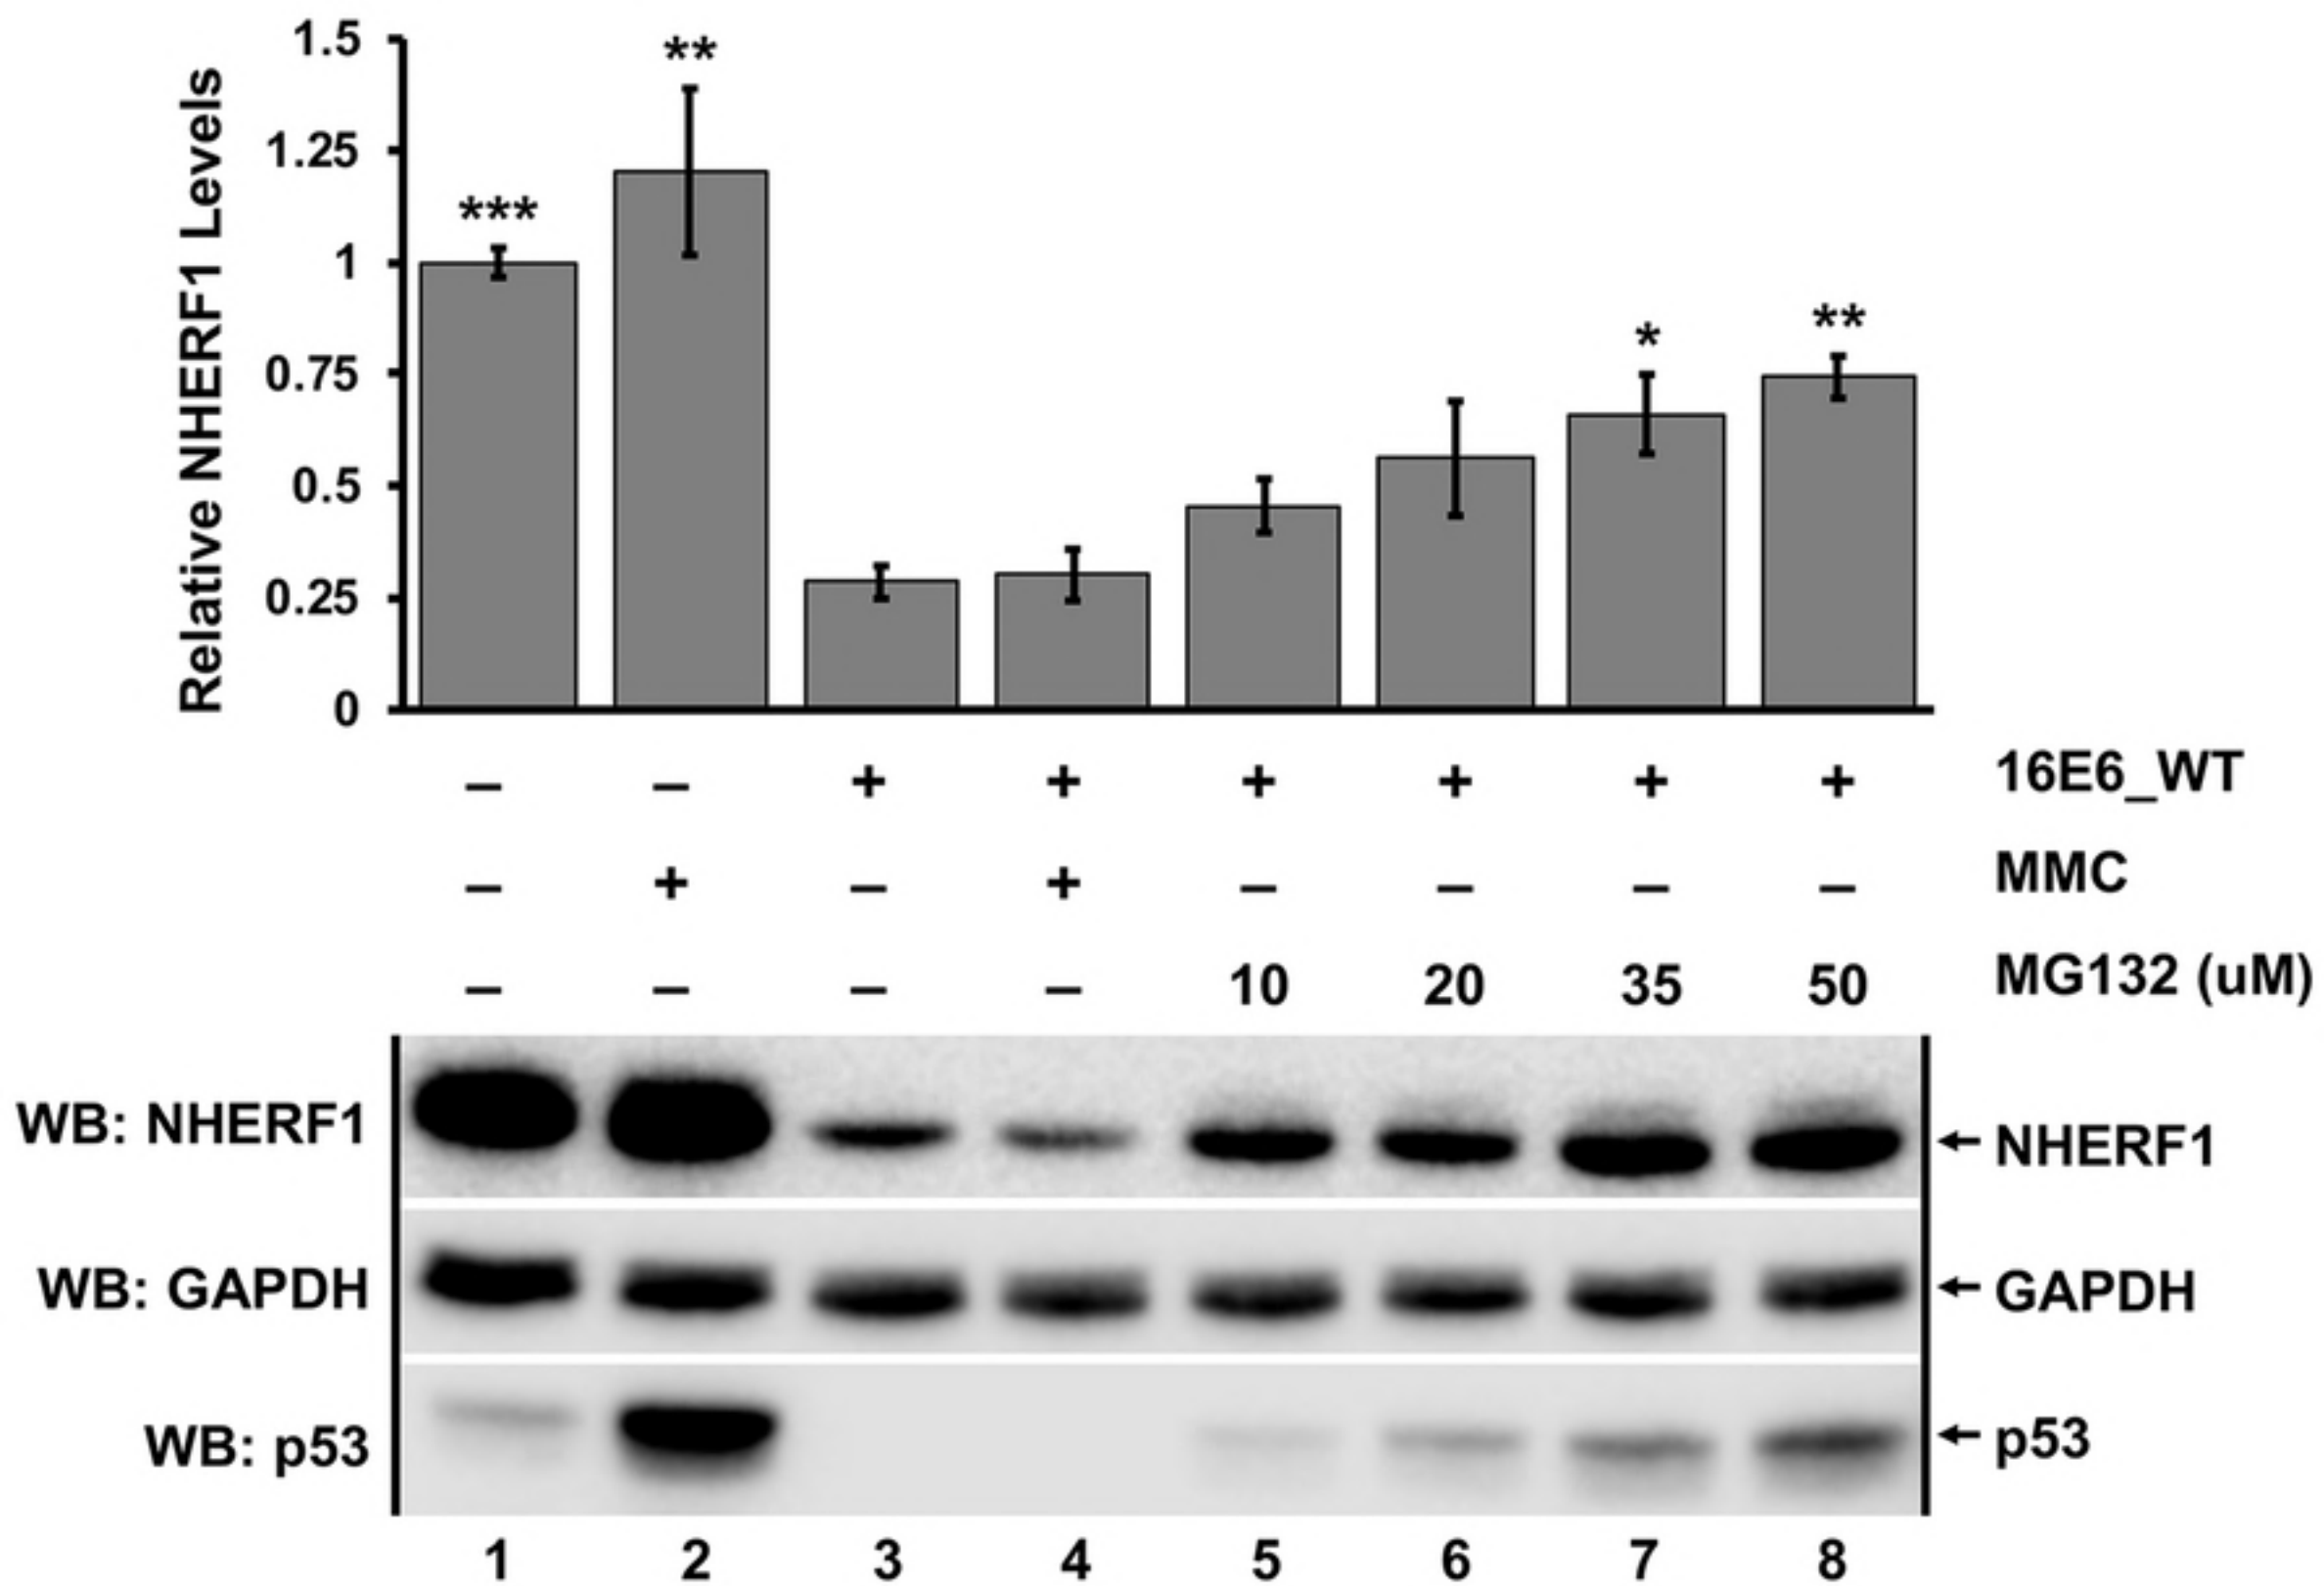

Fig3



**A.**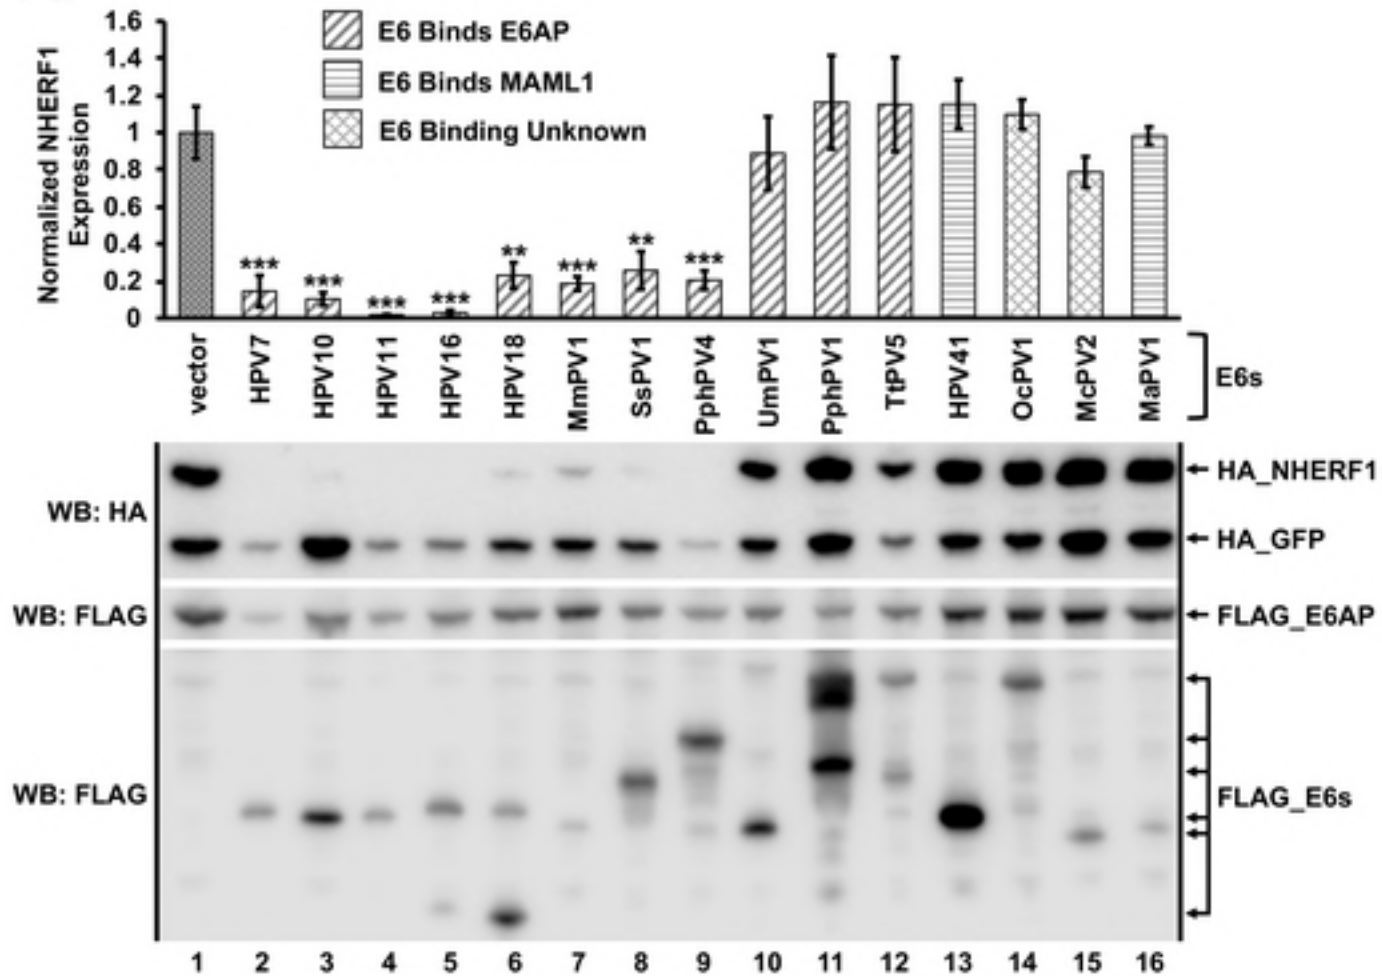**B.**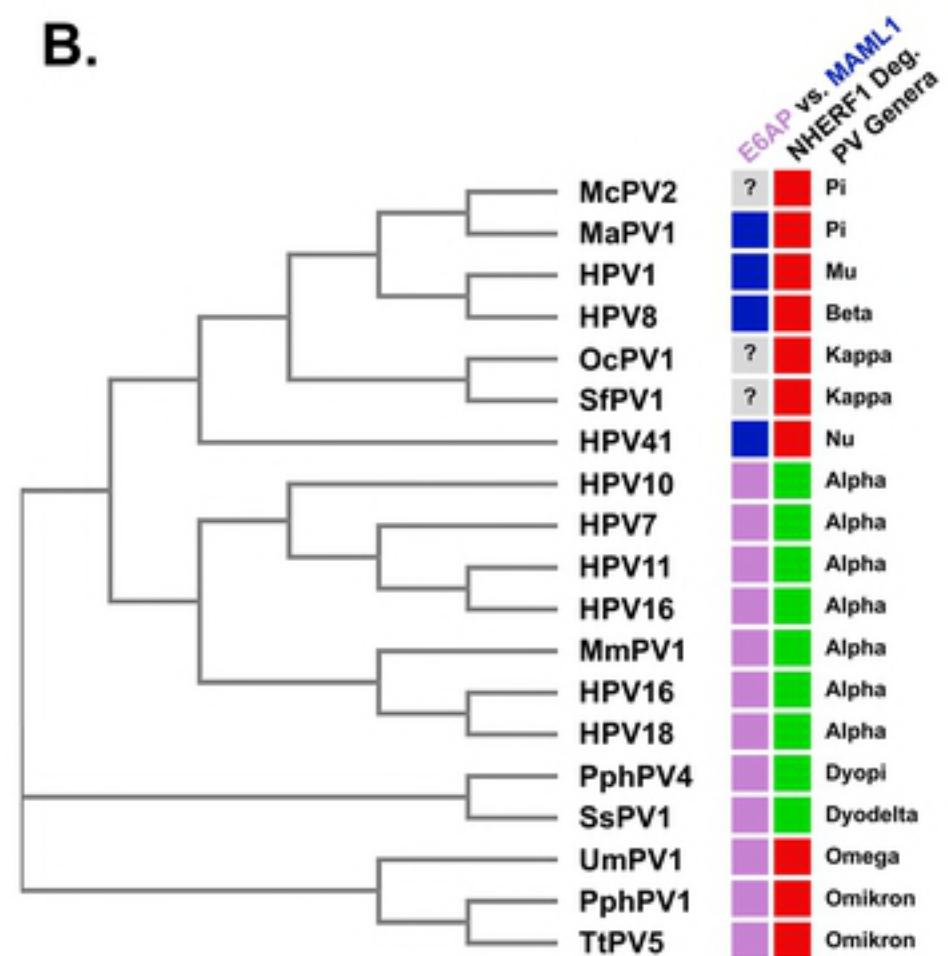**Fig4**

**A.**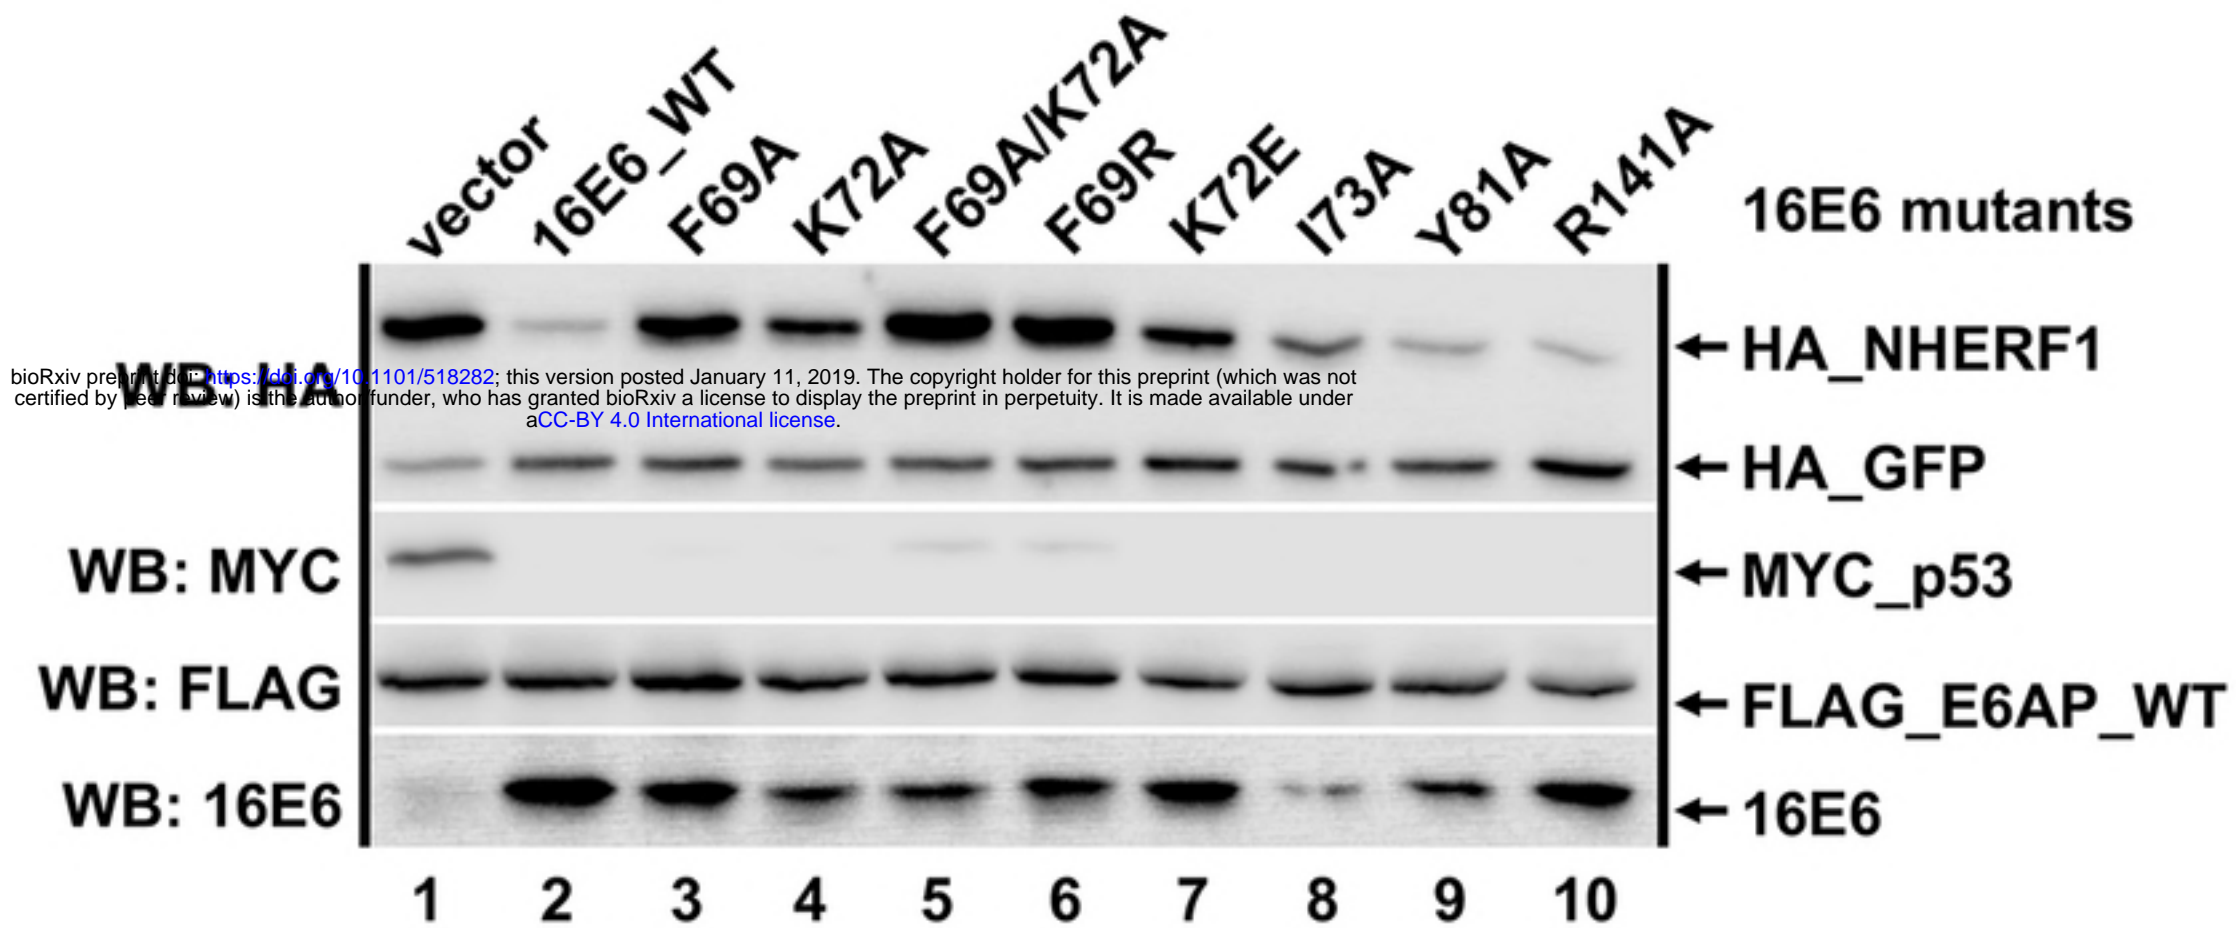**B.**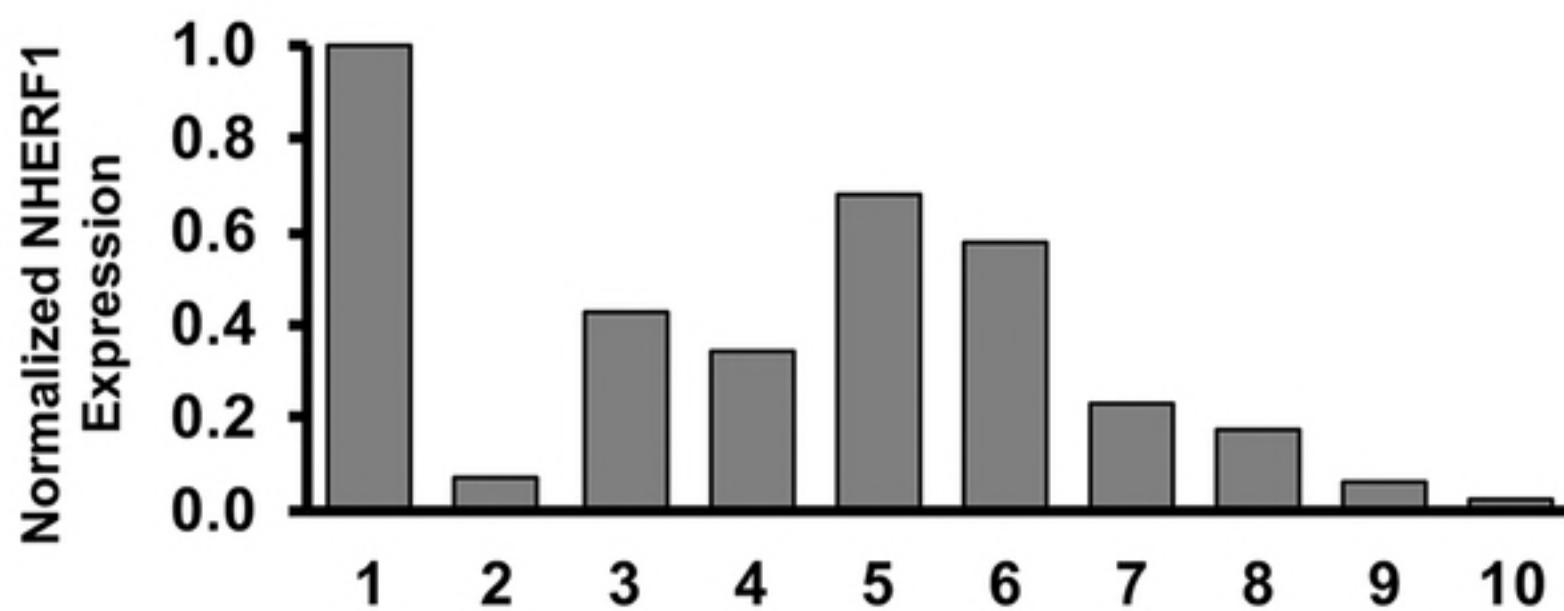**C.**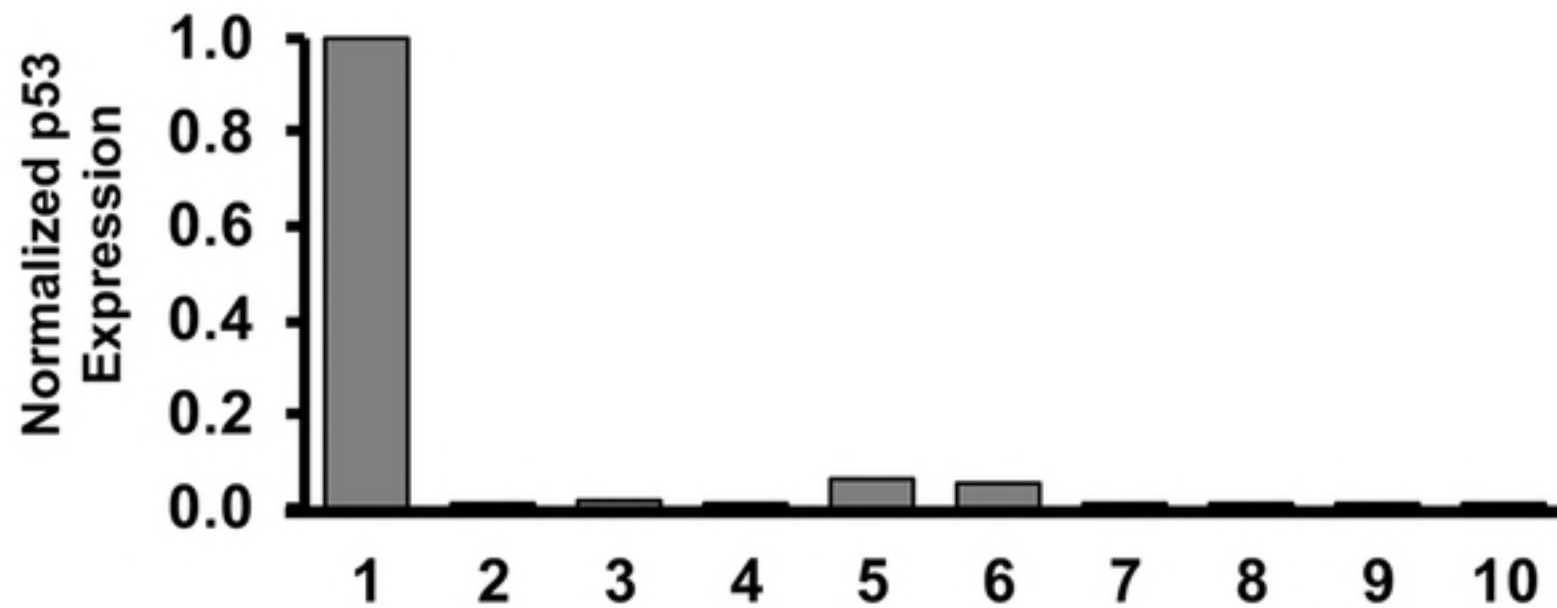

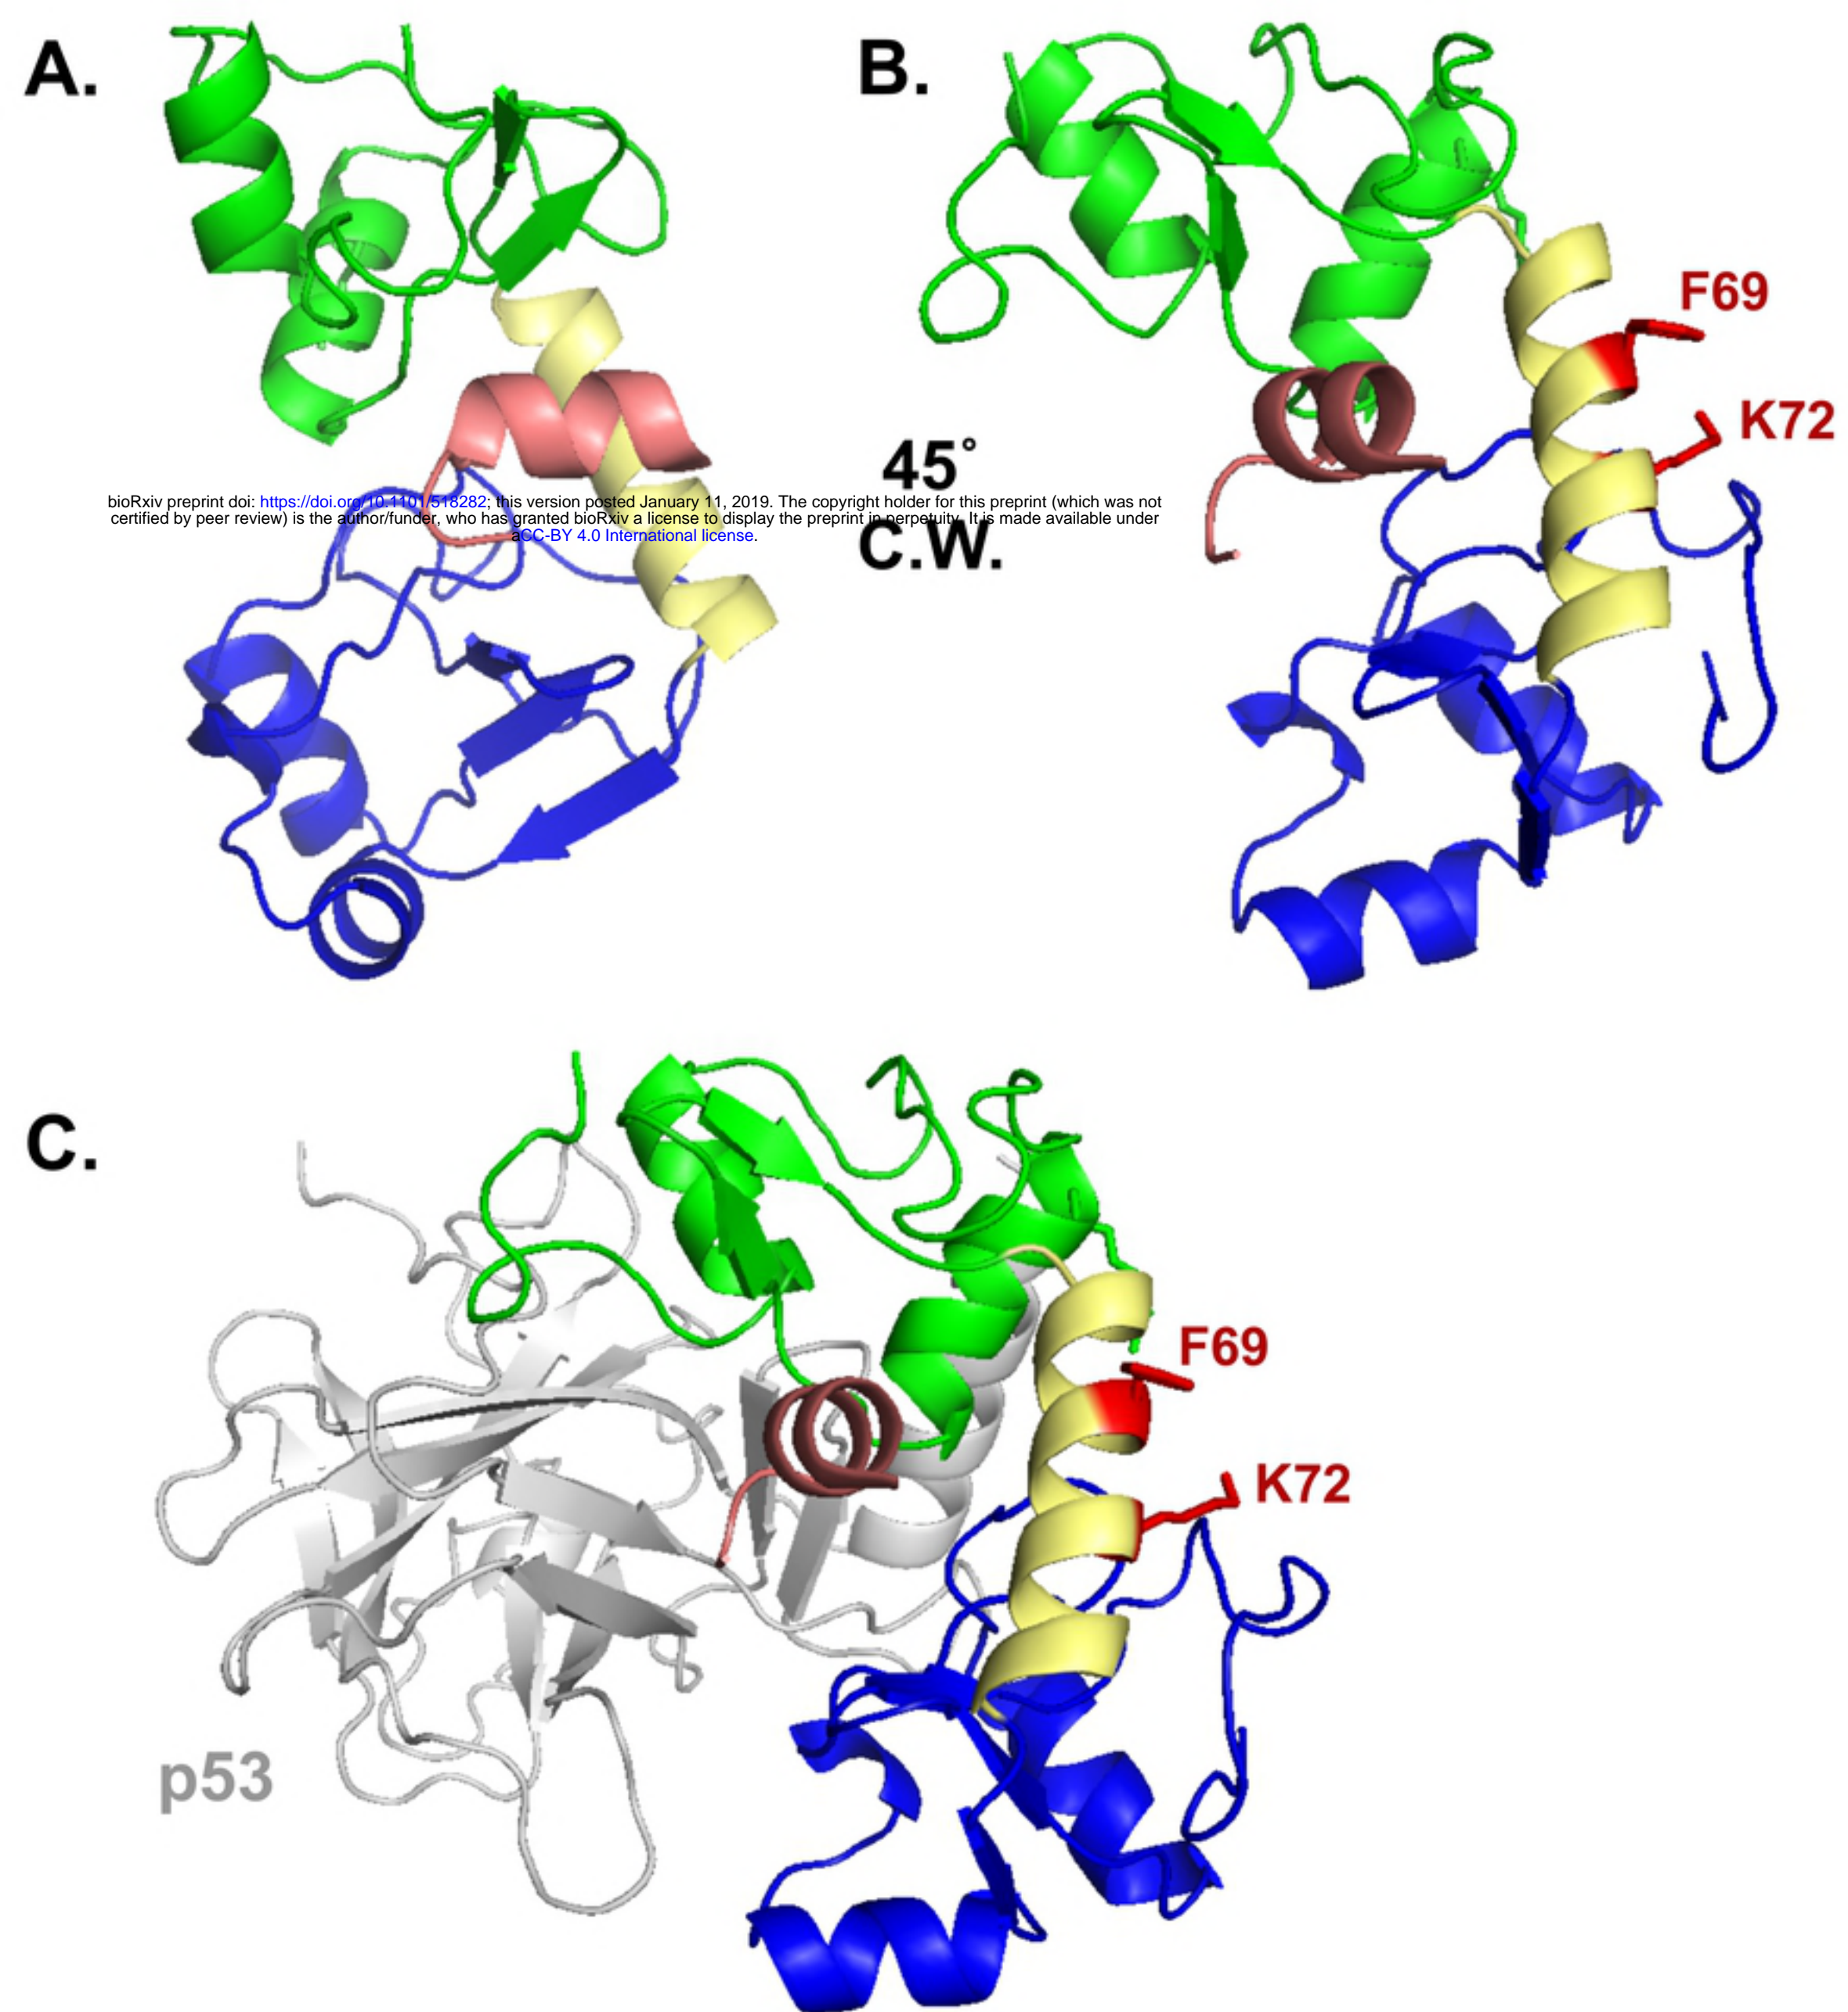

Fig6

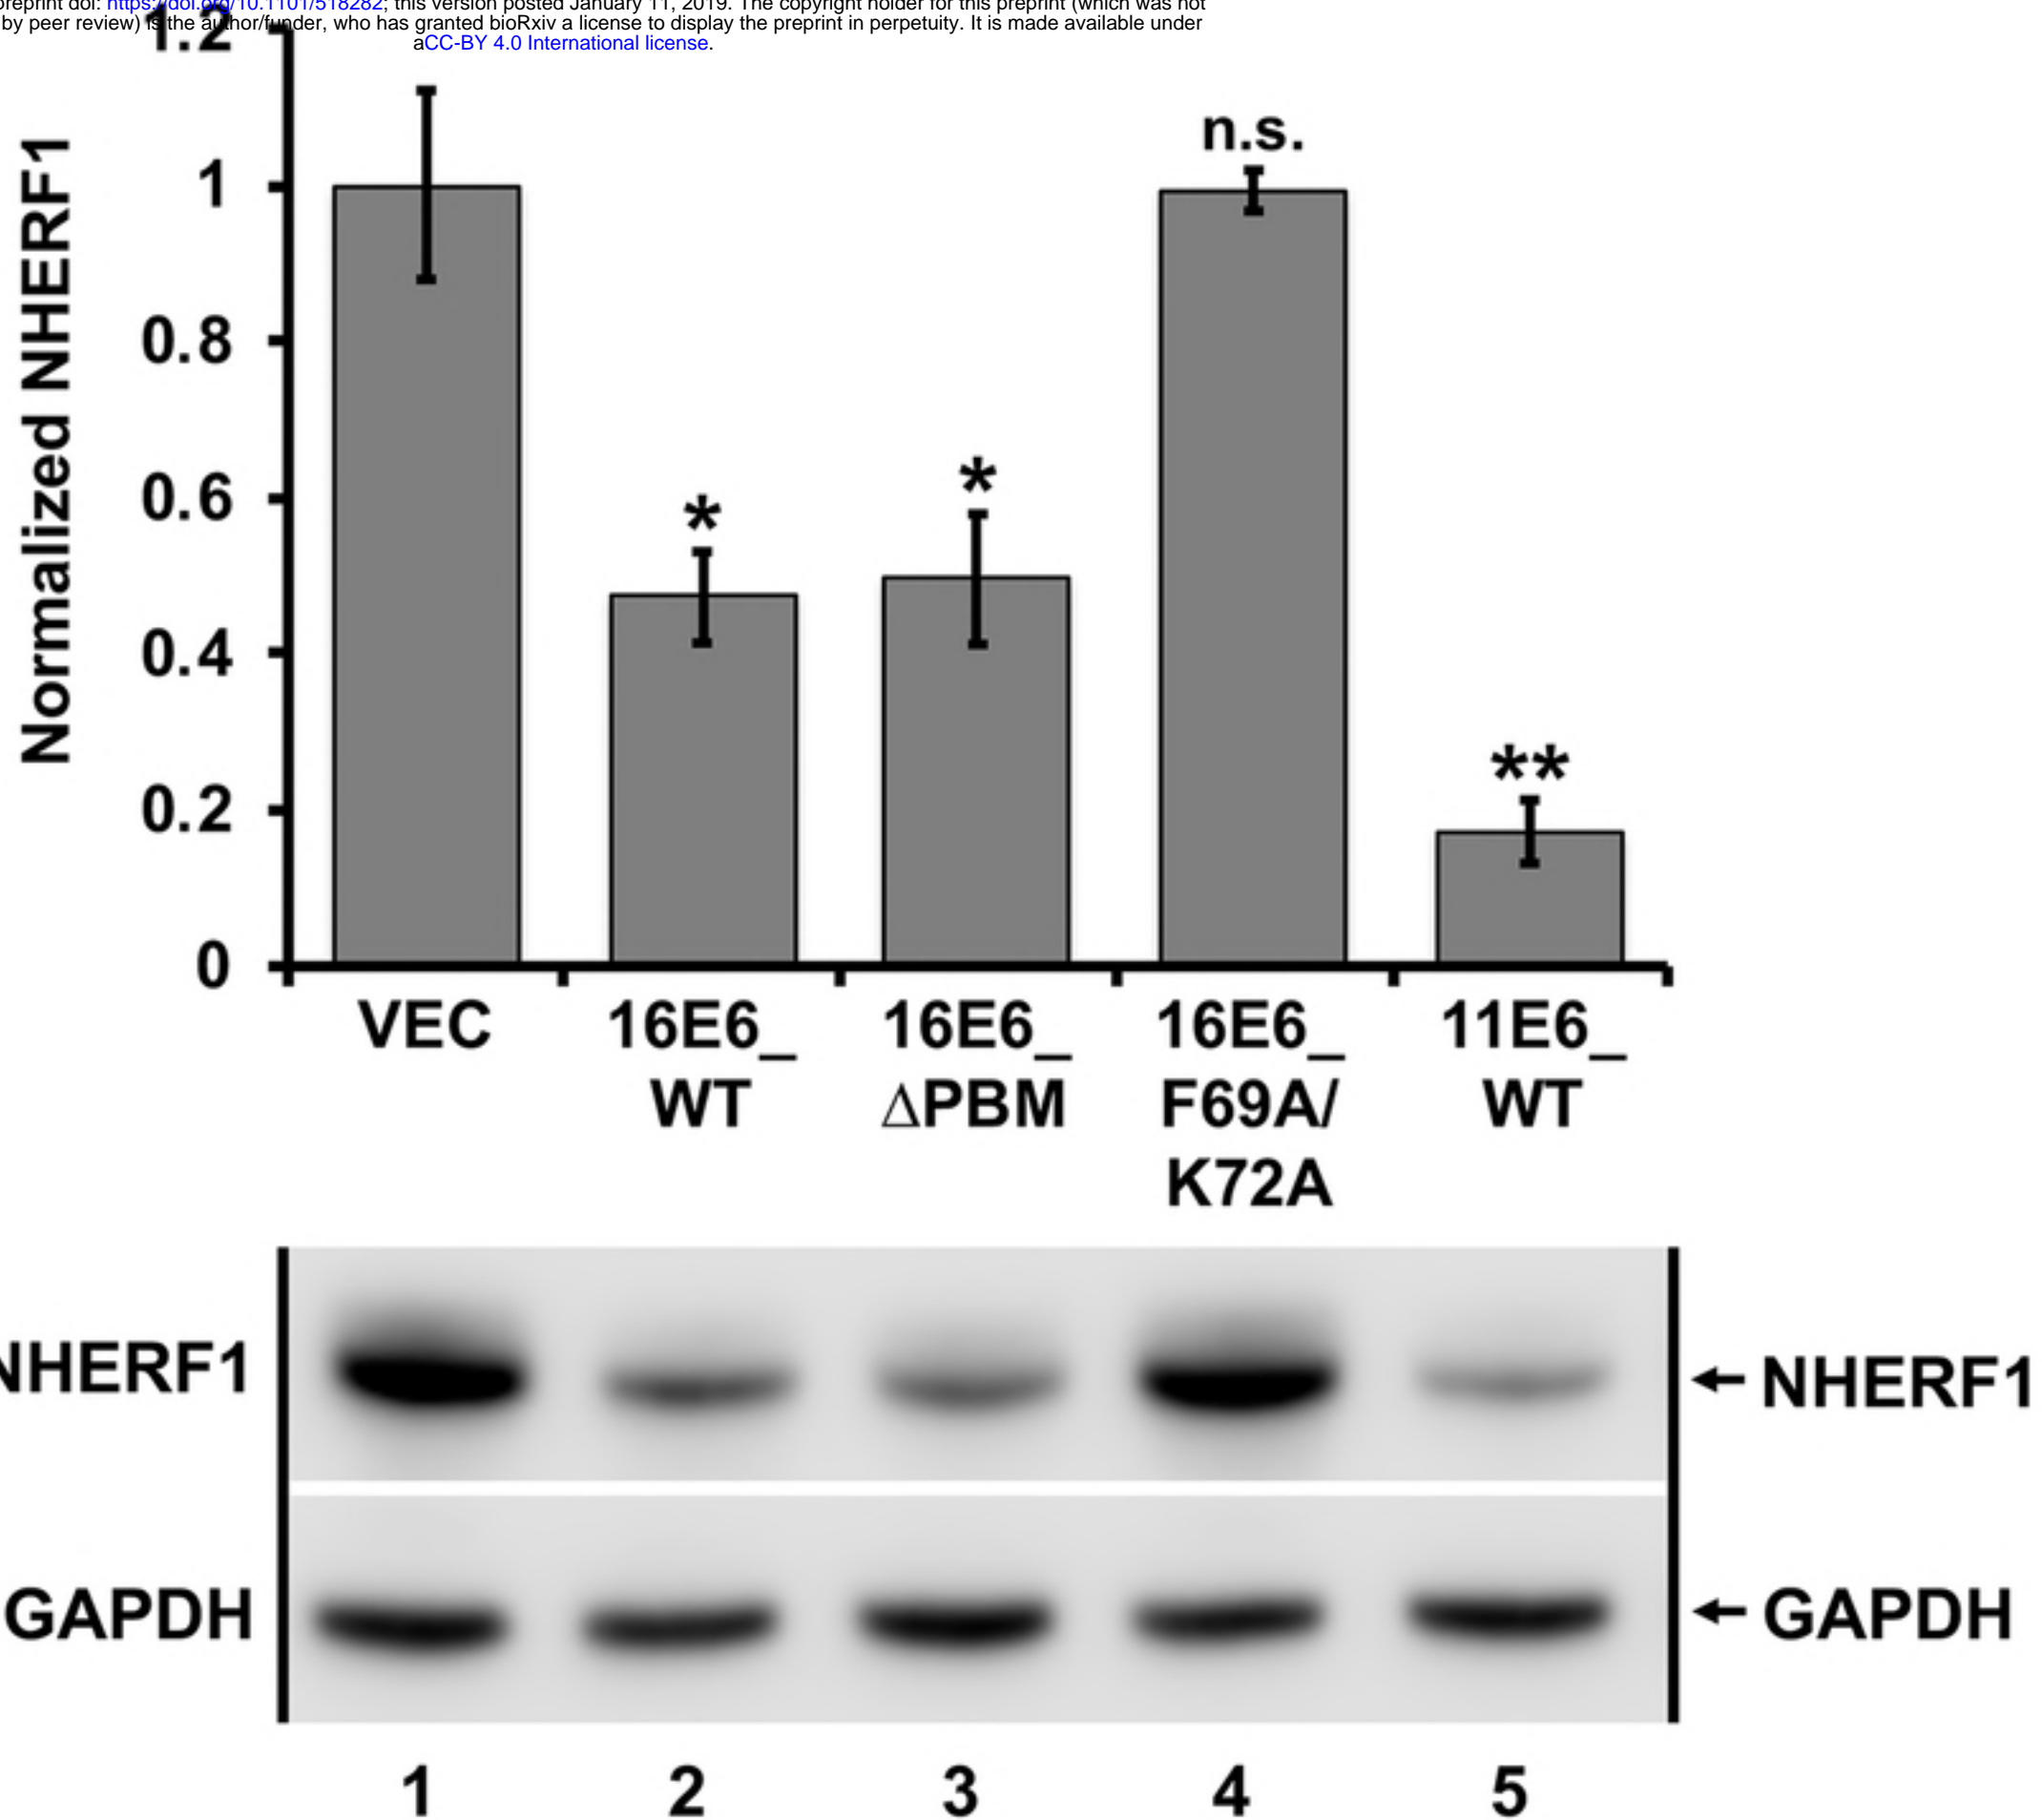

Fig7

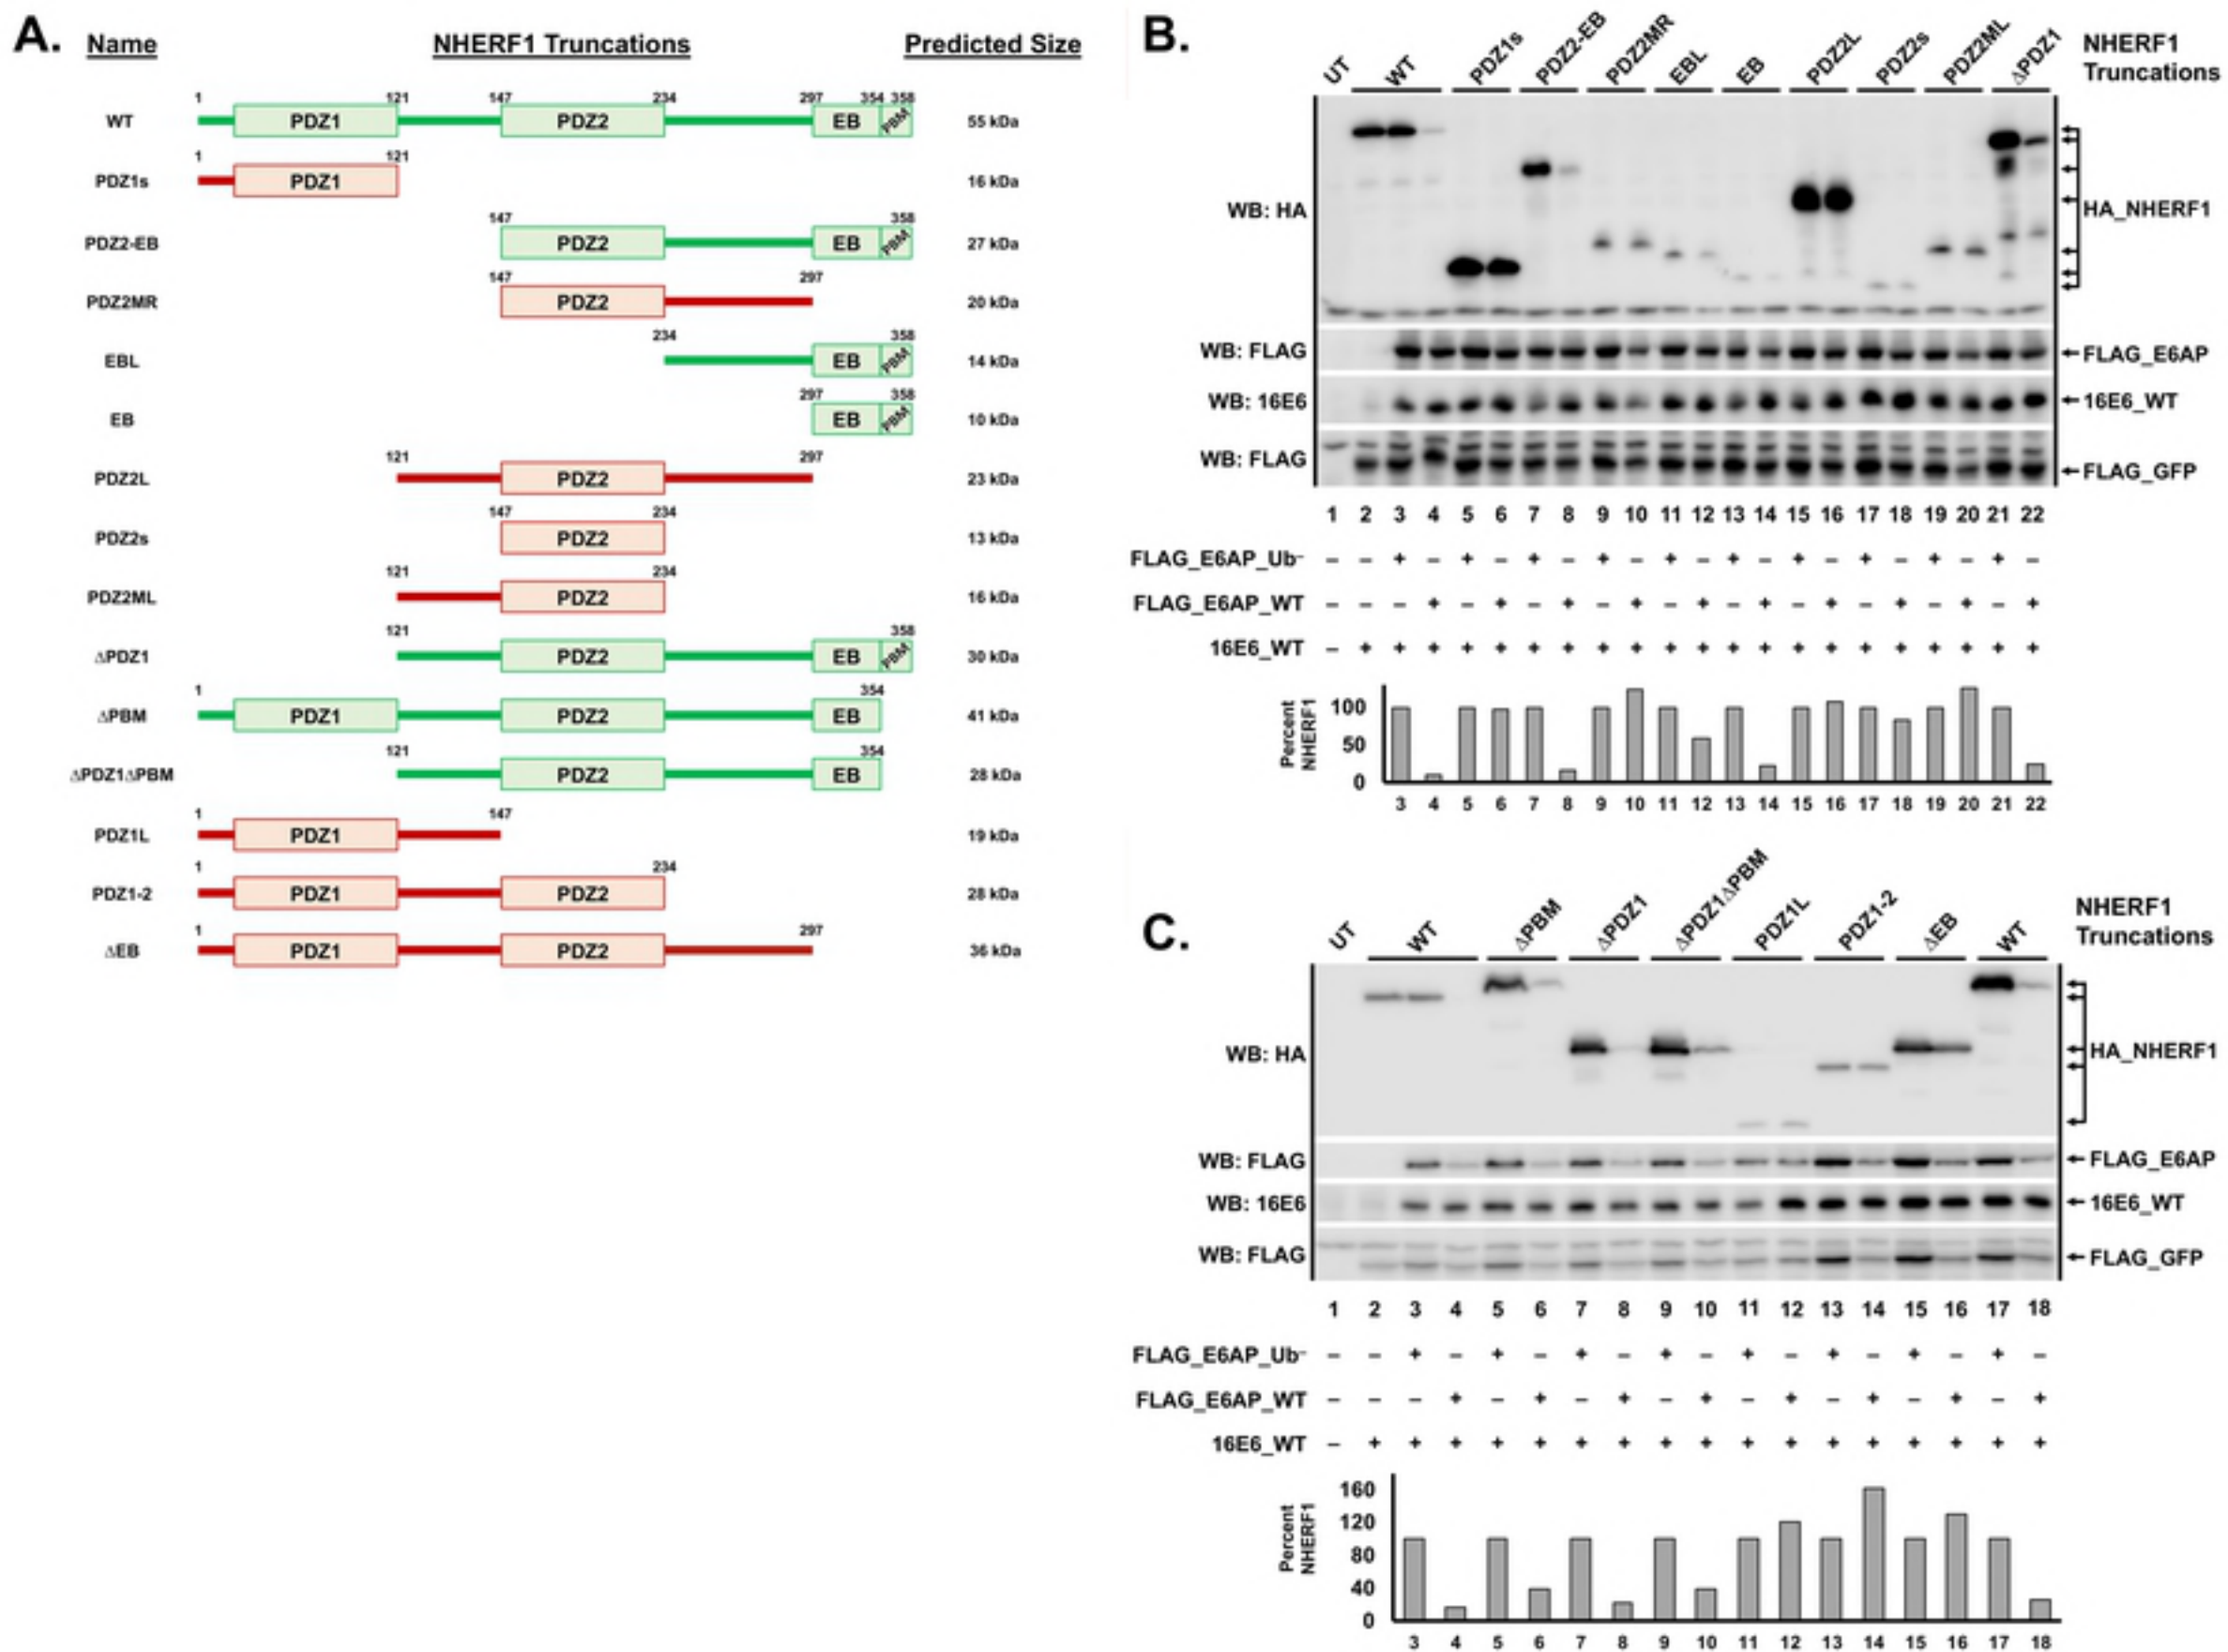

Fig8

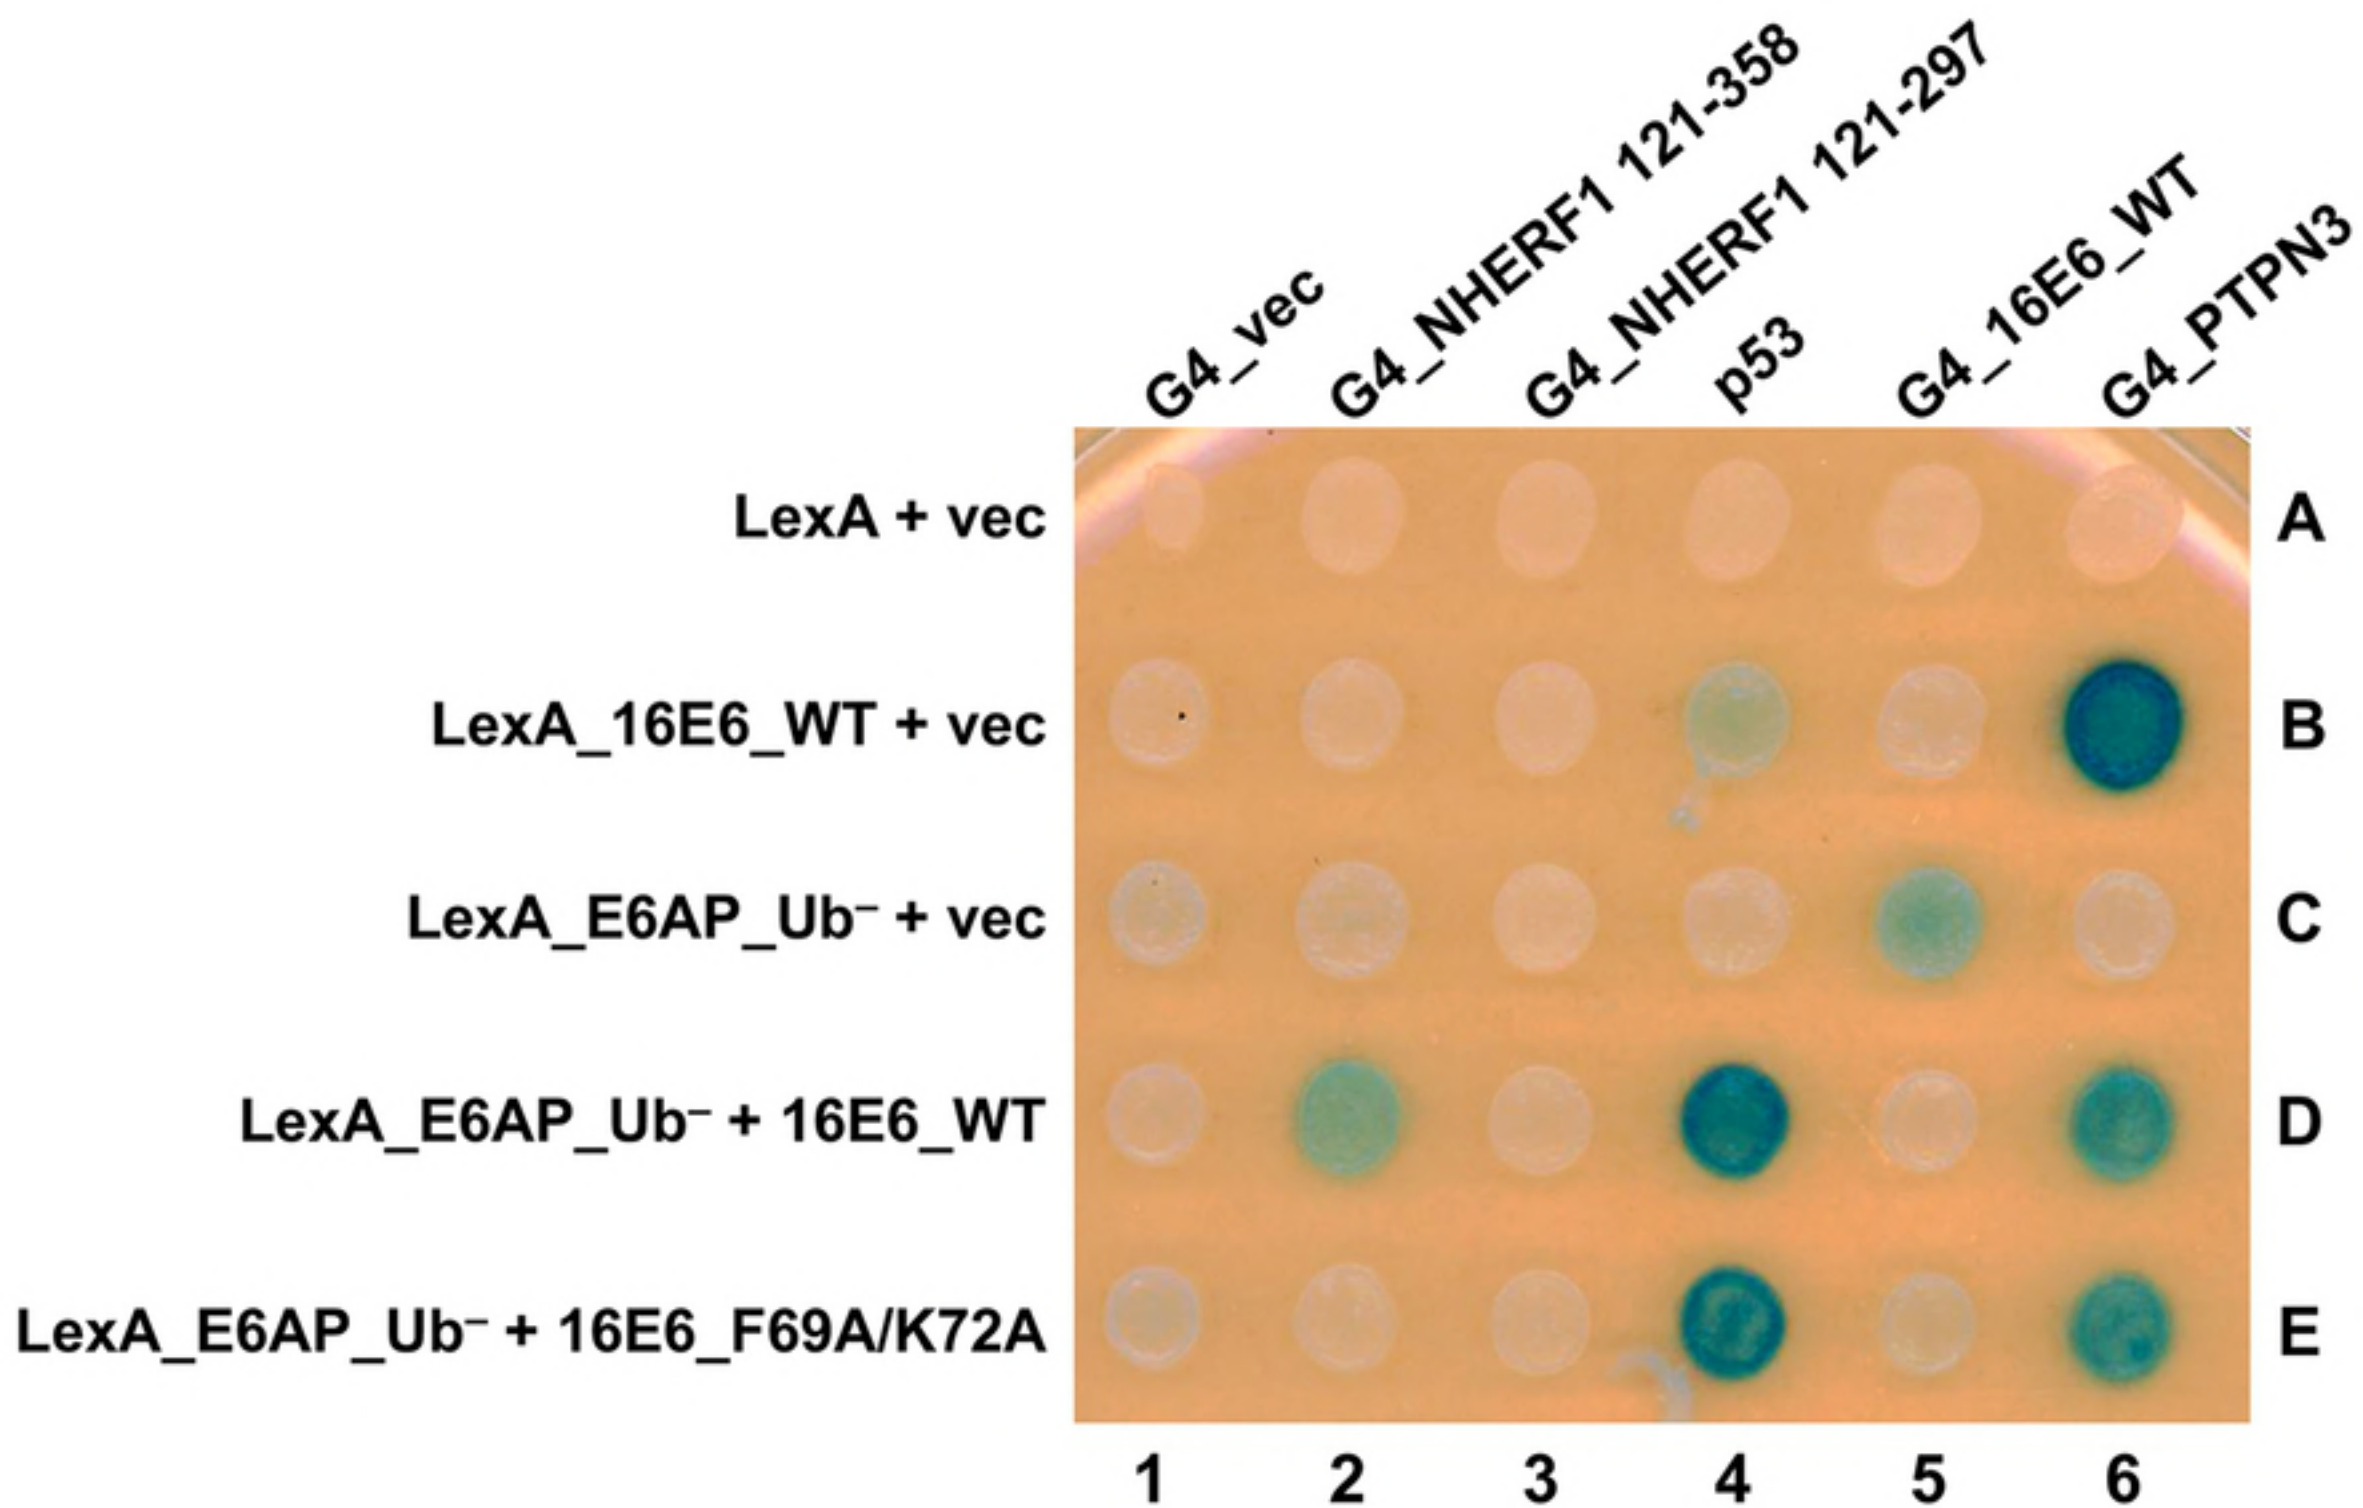

Fig9

Fold Activation (TOP/FOP)

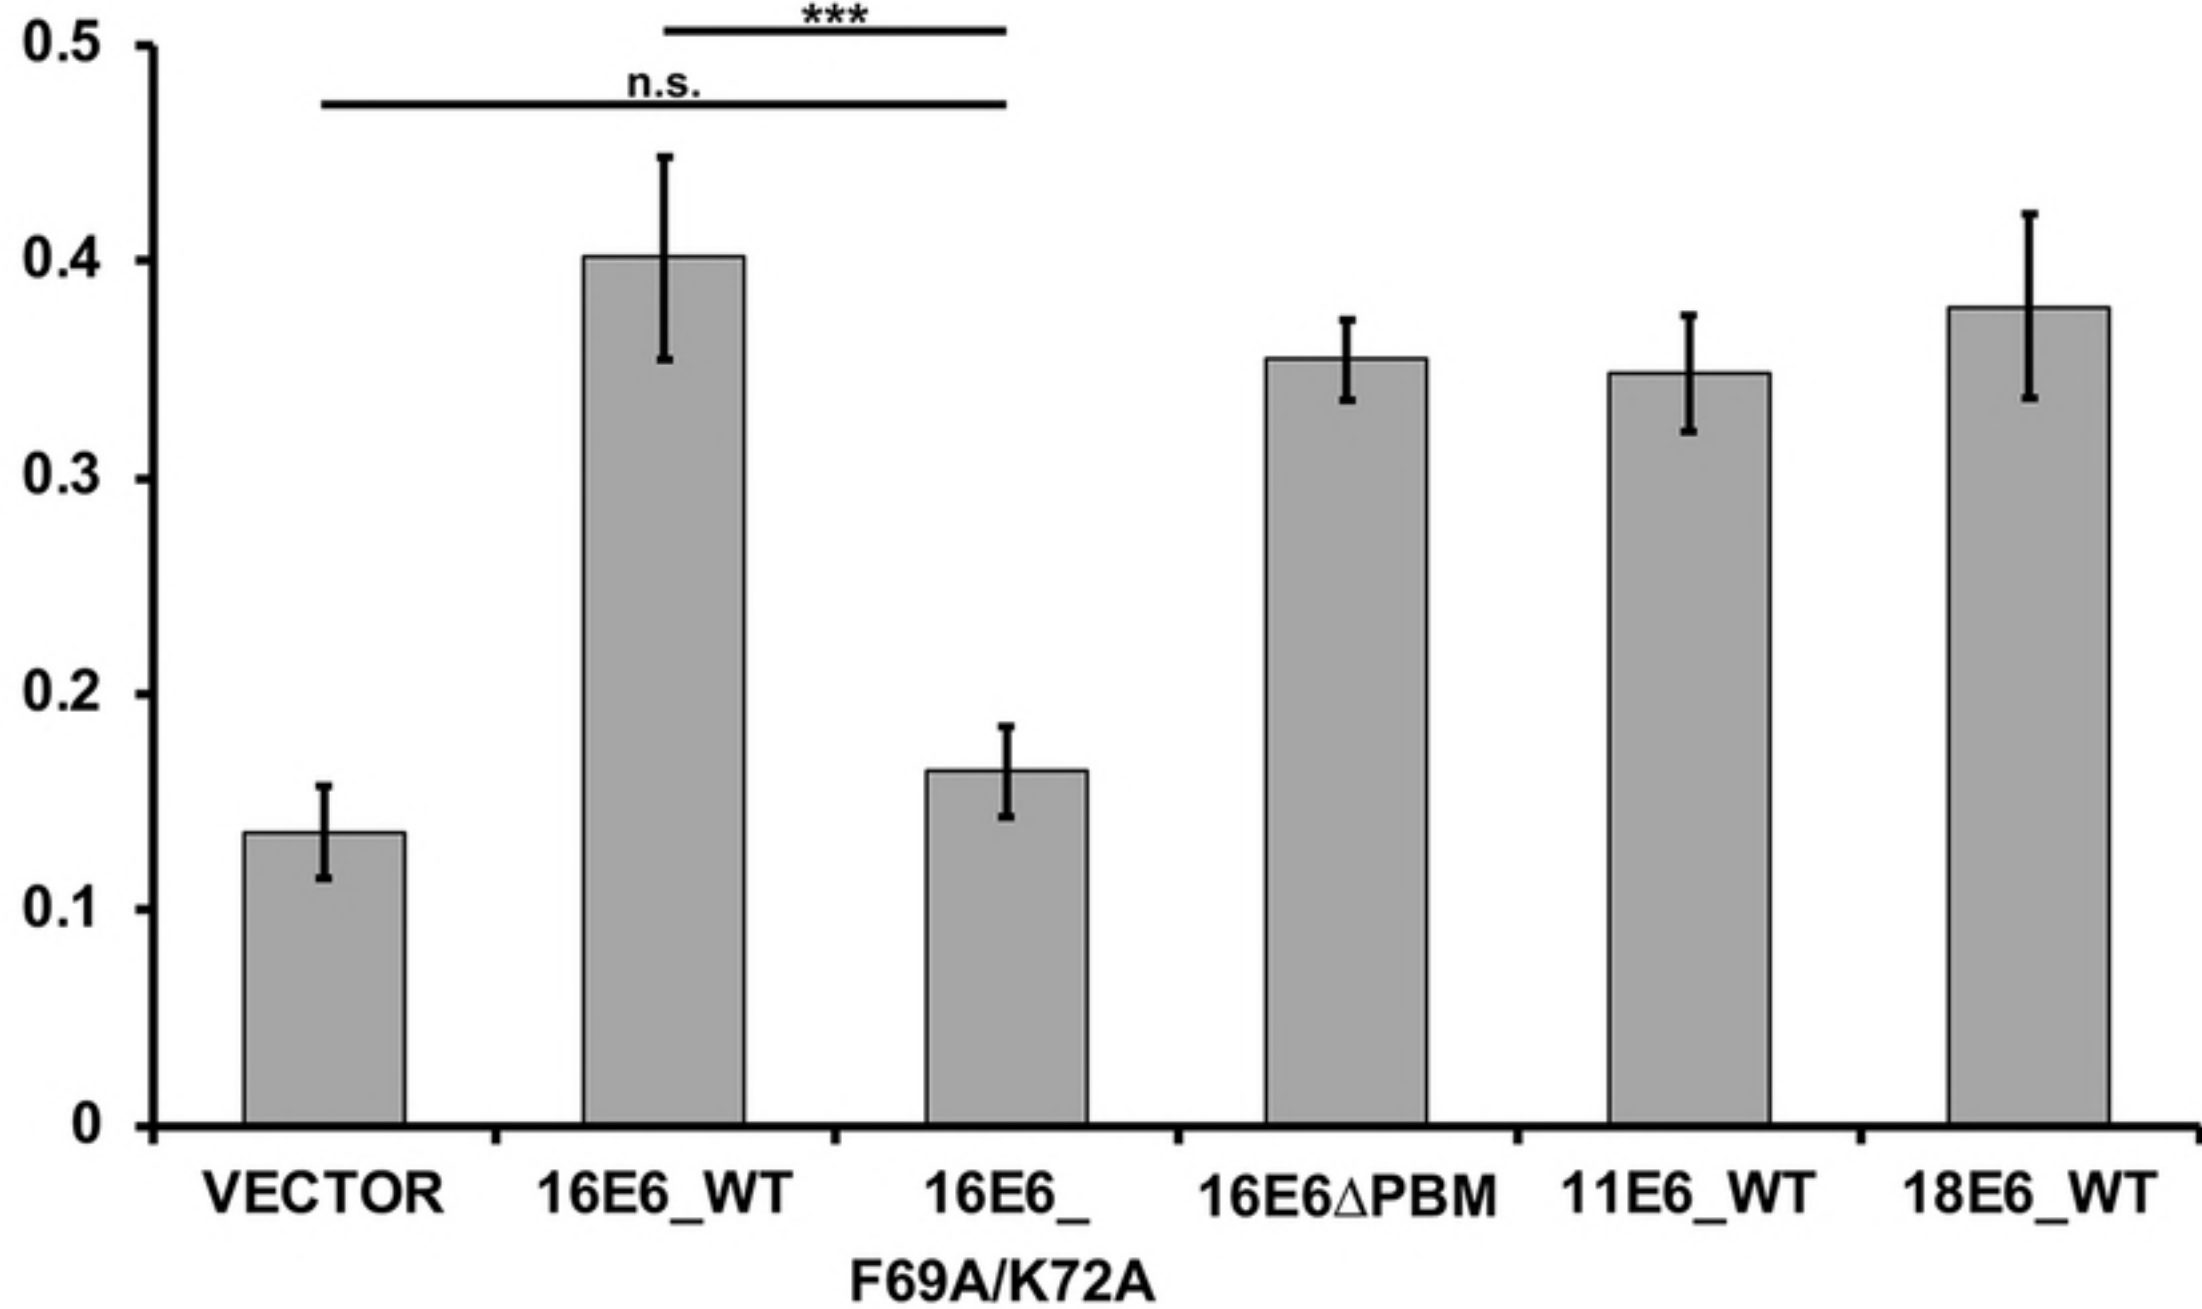

Fig10
